# Supplementary material
Source: PubMed Central journal article supplement (PMC2743491)

# Hemi-Phorboxazole A: Structure Confirmation, Analogue Design and Biological Evaluation

Amos B. Smith, III,<sup>\*,†</sup> Zhuqing Liu,<sup>†</sup> Anne-Marie L. Hogan,<sup>†</sup> Doralyn S. Dalisay<sup>‡</sup> and Tadeusz F. Molinski<sup>‡</sup>

<sup>†</sup>*Department of Chemistry, Laboratory for Research on the Structure of Matter, and Monell Chemical Senses Center, University of Pennsylvania, Philadelphia, Pennsylvania 19104 and* <sup>‡</sup>*Department of Chemical and Biochemistry, and Skaggs School of Pharmacy and Pharmaceutical Sciences, University of California, San Diego, 9500 Gilman Drive, MC0358, La Jolla, CA 92093*

*smithab@sas.upenn.edu*

*Supporting Information 2*

## Table of Contents

|                                                         |    |
|---------------------------------------------------------|----|
| NMR spectra of alcohol (+)- <b>25</b>                   | 3  |
| NMR spectra of hemi-phorboxazole A (+)- <b>1</b>        | 5  |
| CD spectrum of hemi-phorboxazole A (+)- <b>1</b>        | 7  |
| NMR spectra of hemi-phorboxazole analogue (+)- <b>3</b> | 8  |
| NMR spectra of alcohol <b>26</b>                        | 10 |
| NMR spectra of aldehyde <b>16</b>                       | 12 |
| NMR spectra of acetal (-)- <b>19</b>                    | 14 |
| NMR spectra of alcohol (-)- <b>27</b>                   | 16 |
| NMR spectra of chloride (-)- <b>20</b>                  | 18 |
| NMR spectra of Wittig salt (-)- <b>28</b>               | 20 |
| NMR spectra of styrene (+)- <b>21</b>                   | 22 |
| NMR spectra of alcohol (+)- <b>29</b>                   | 24 |
| NMR spectra of aldehyde (+)- <b>30</b>                  | 26 |
| NMR spectra of hydroxy-aldehyde (-)- <b>22</b>          | 28 |
| NMR spectra of vinyl iodide (-)- <b>24</b>              | 30 |
| NMR spectra of hemi-phorboxazole analogue (-)- <b>4</b> | 32 |

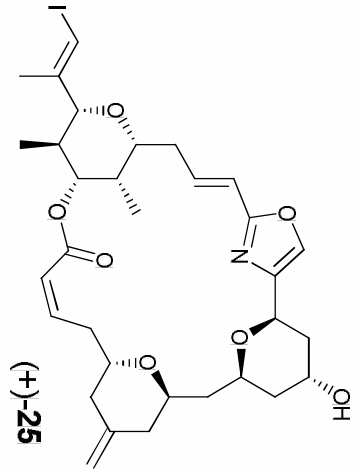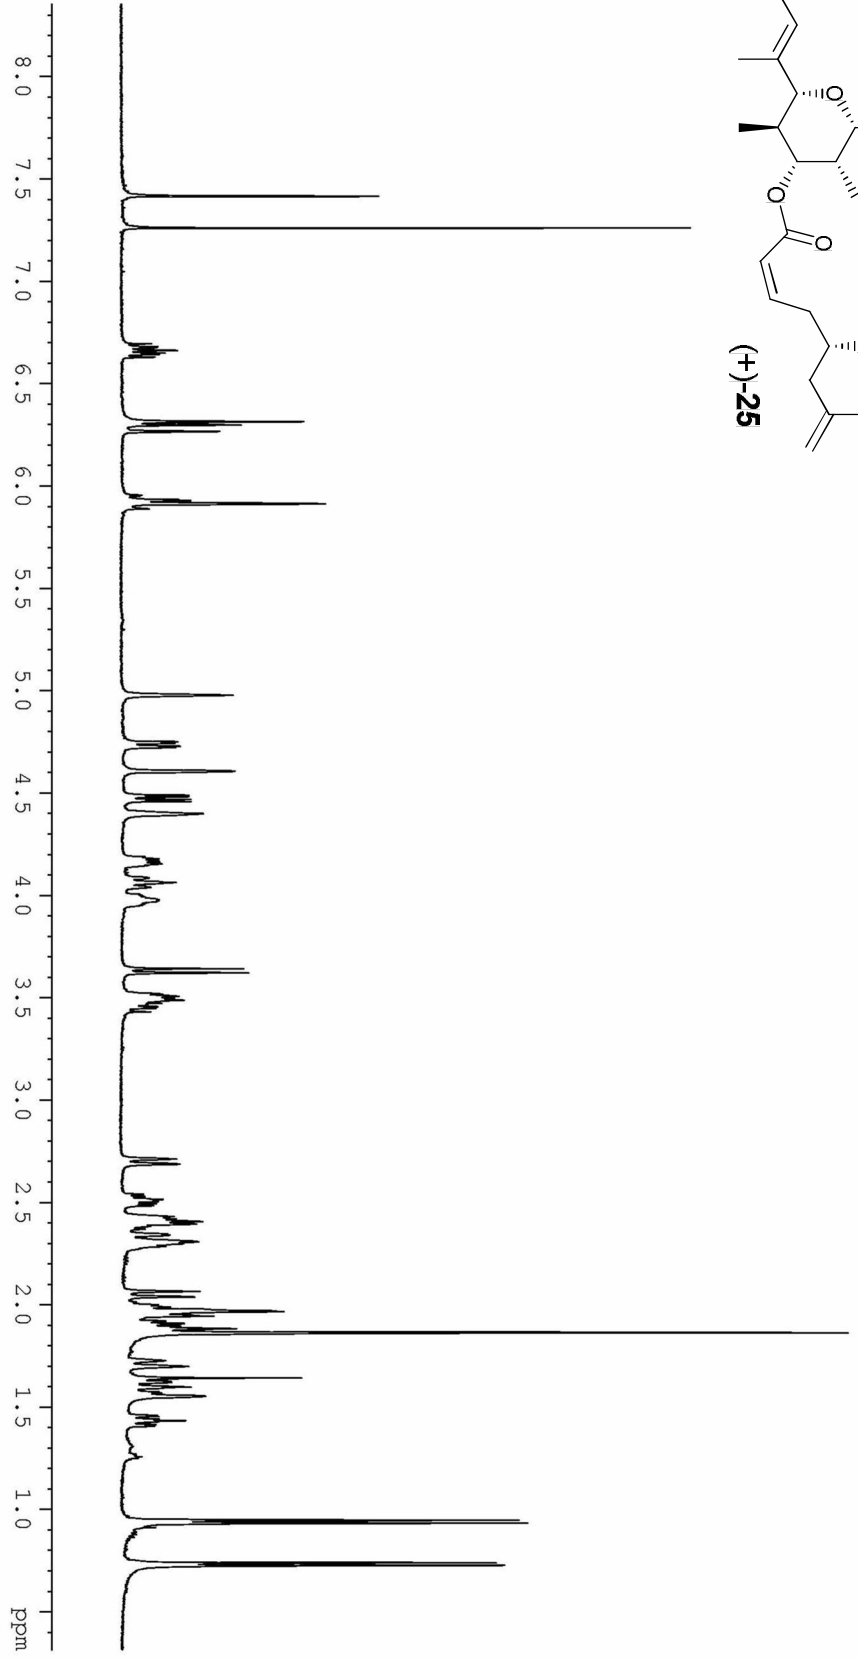

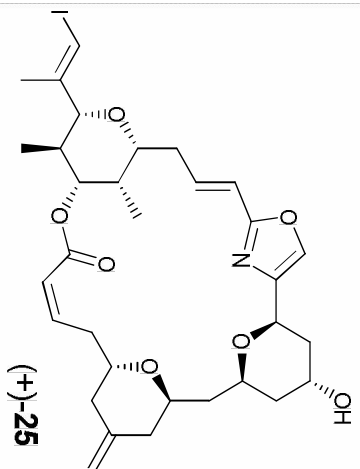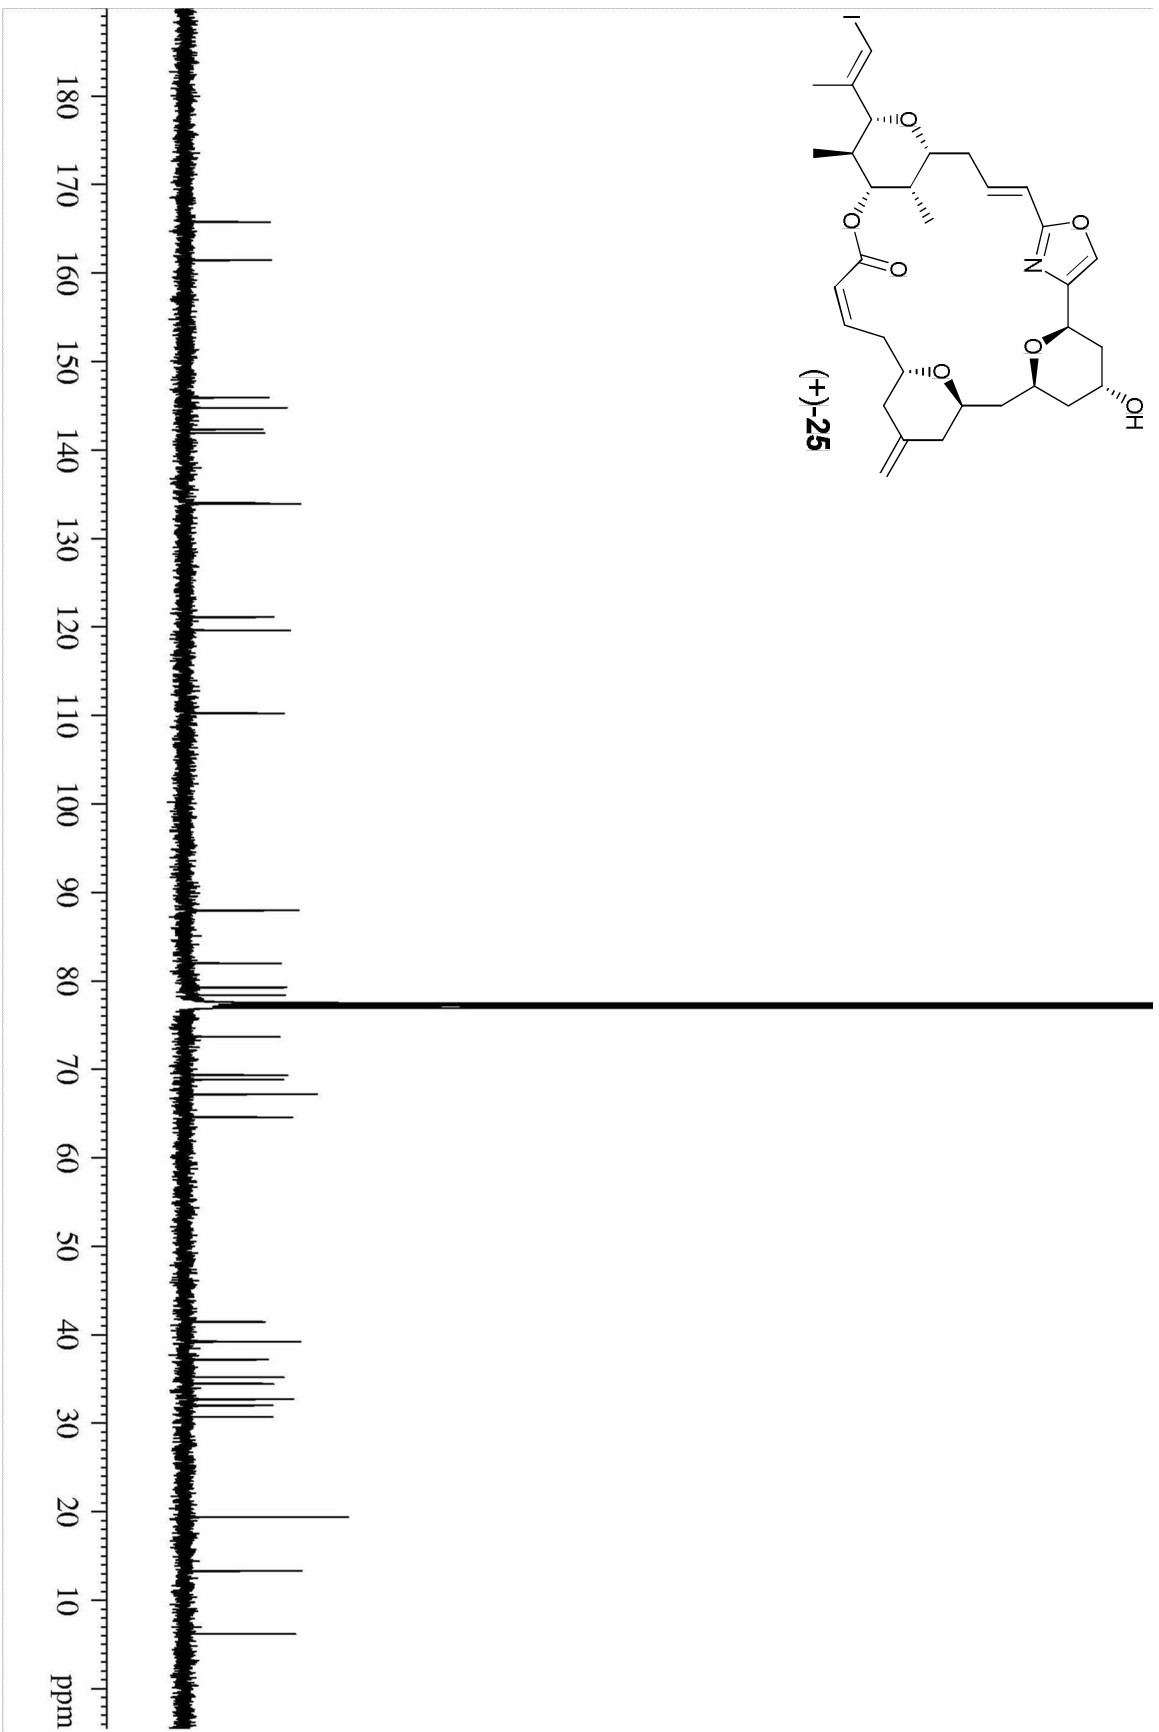

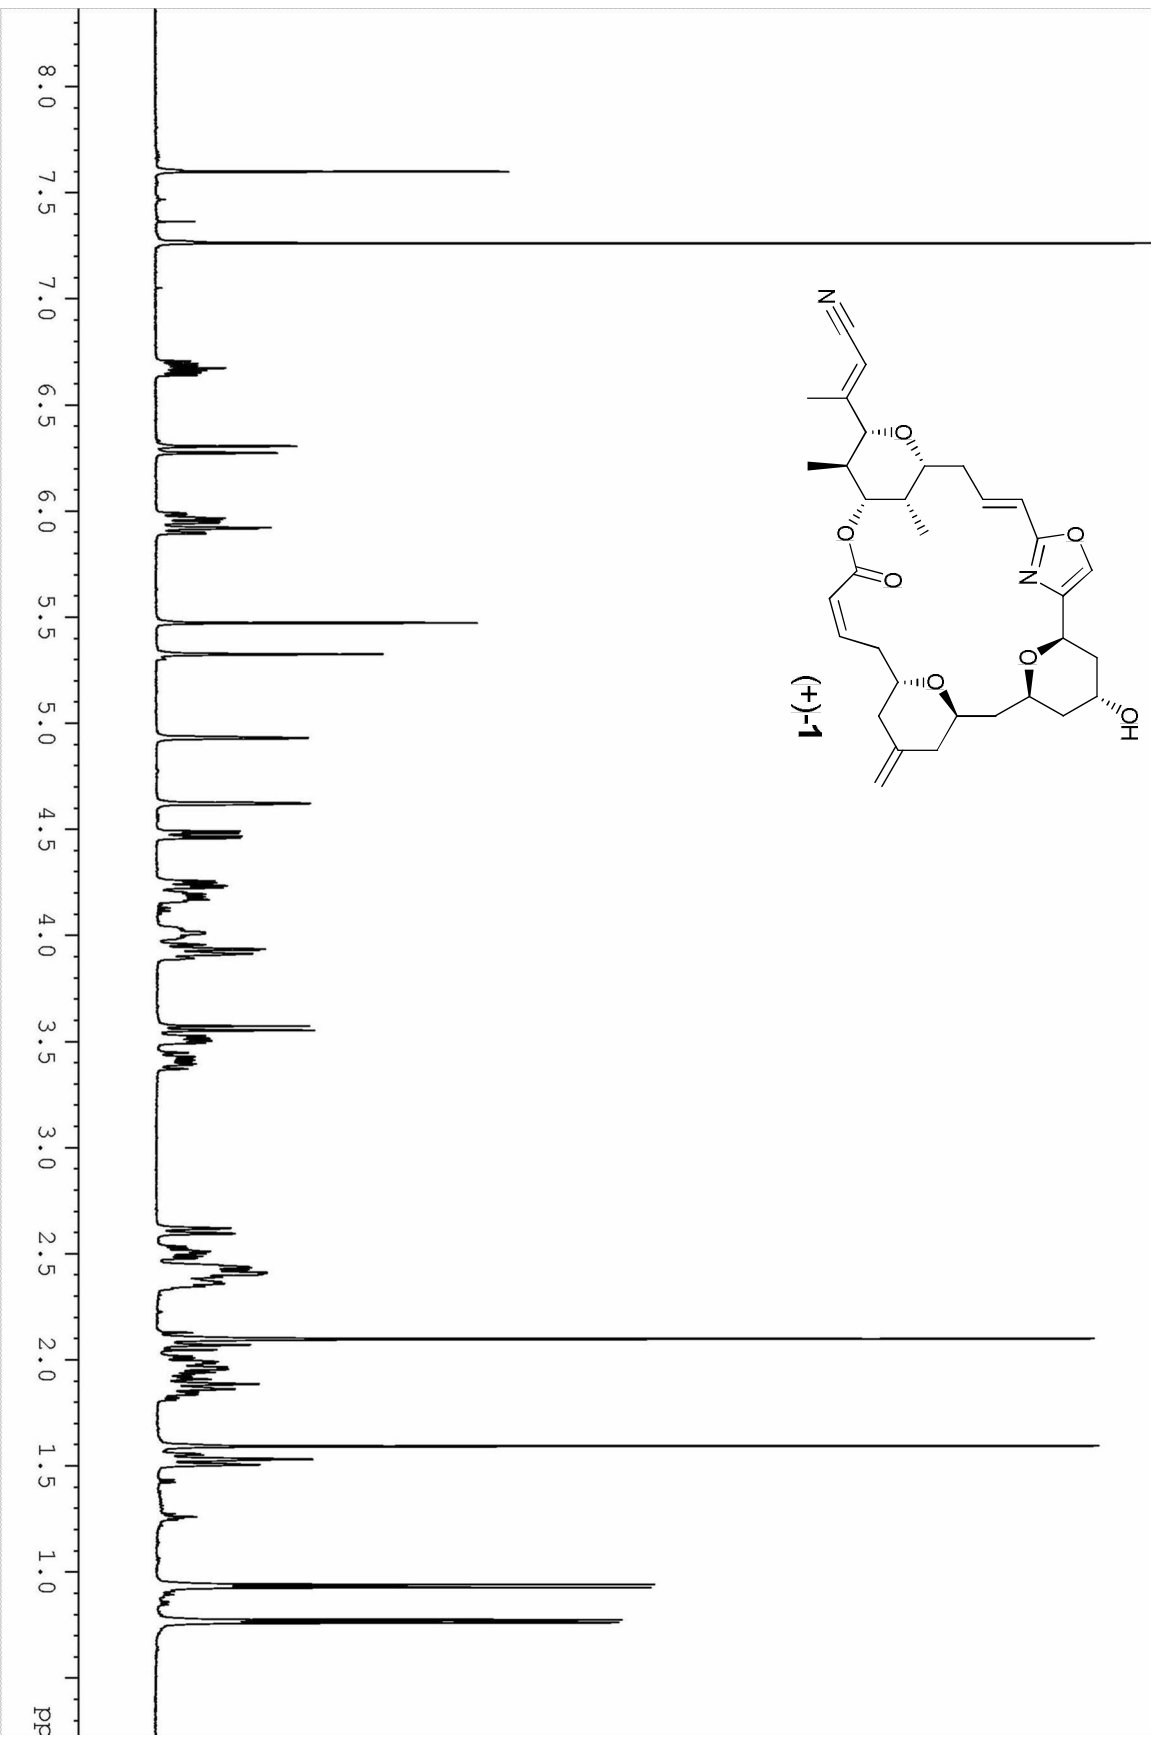

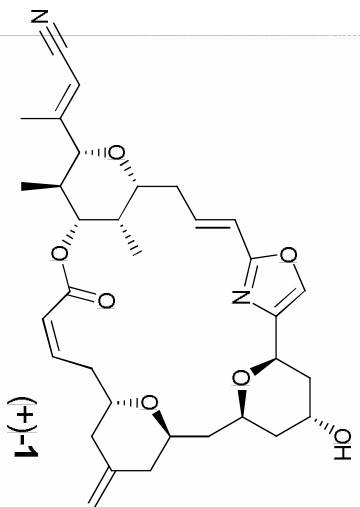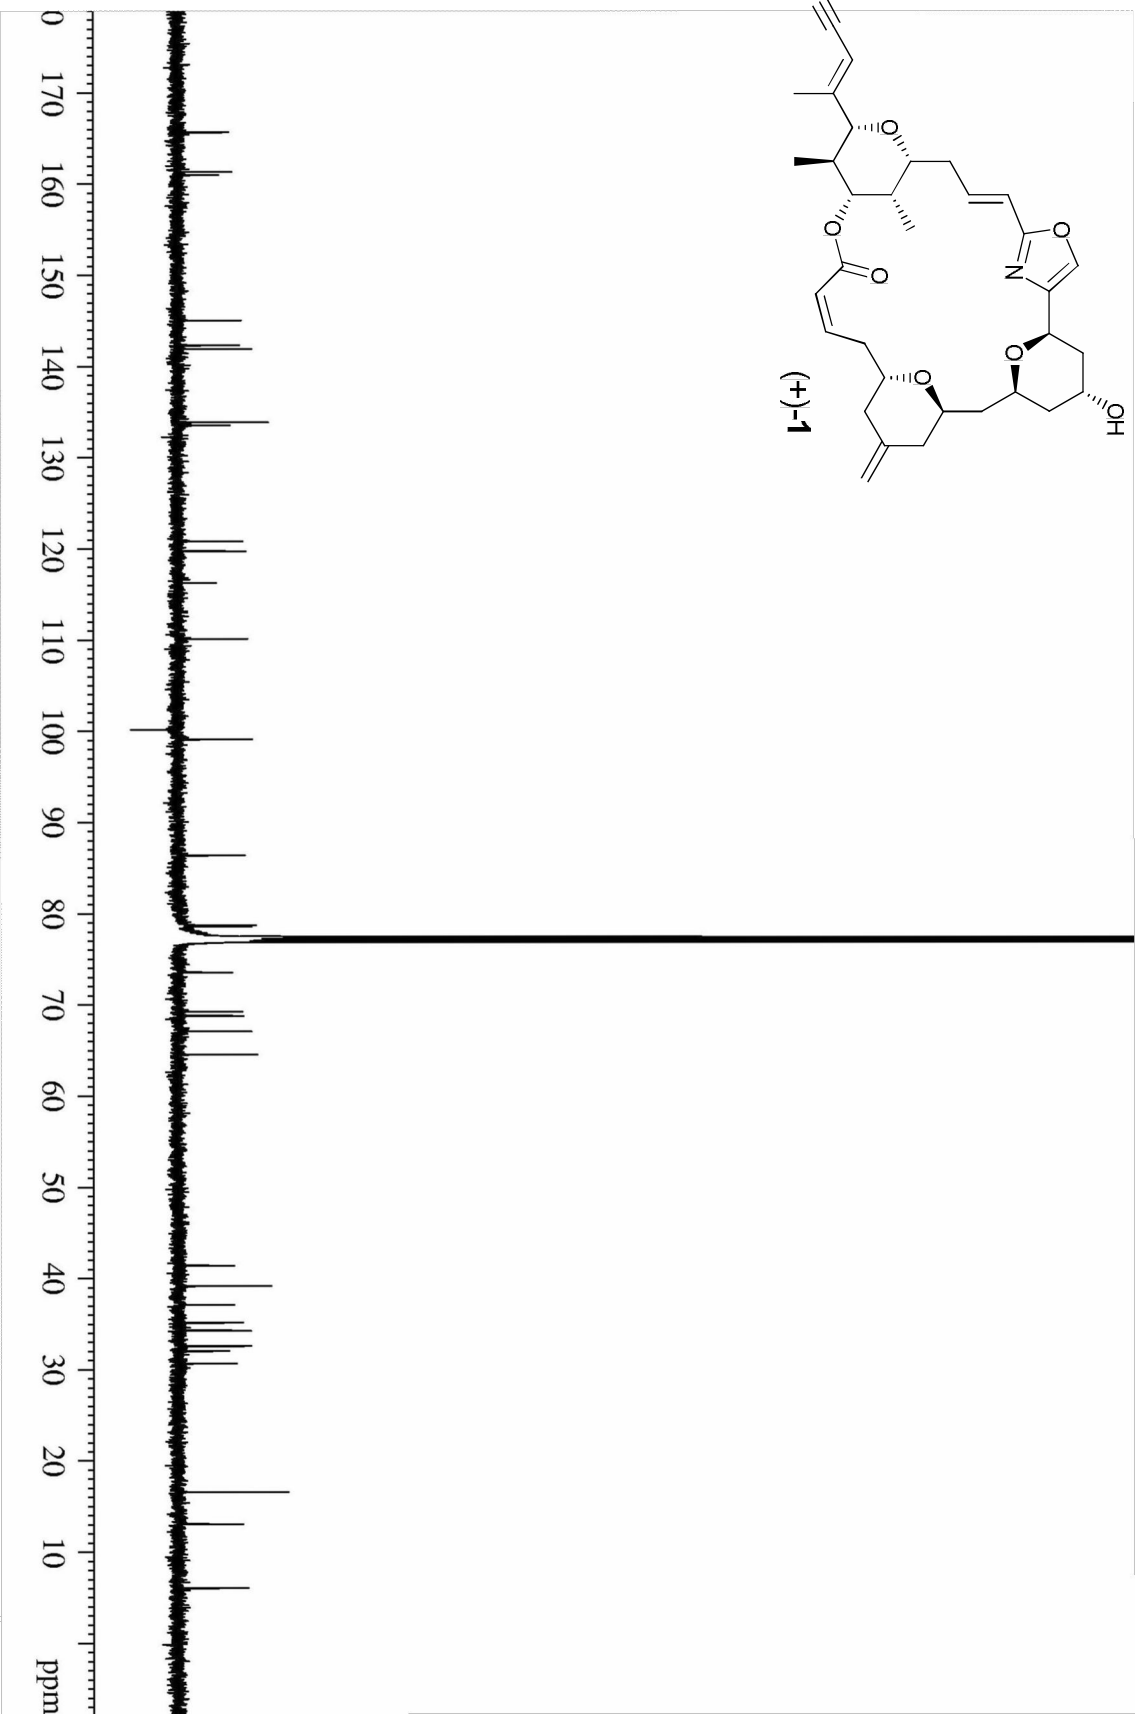

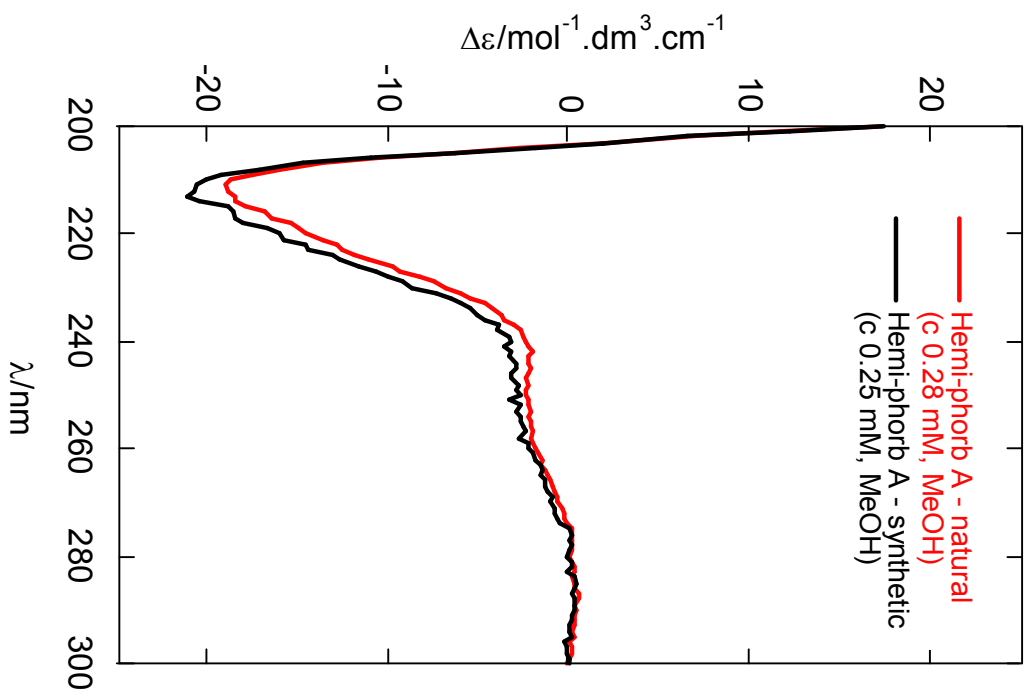

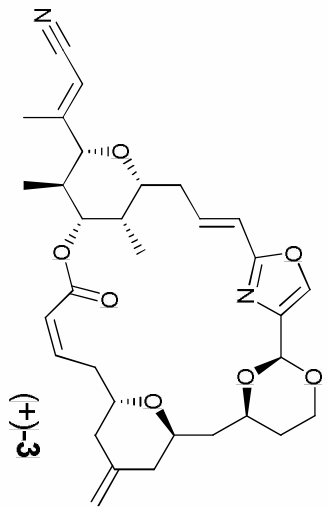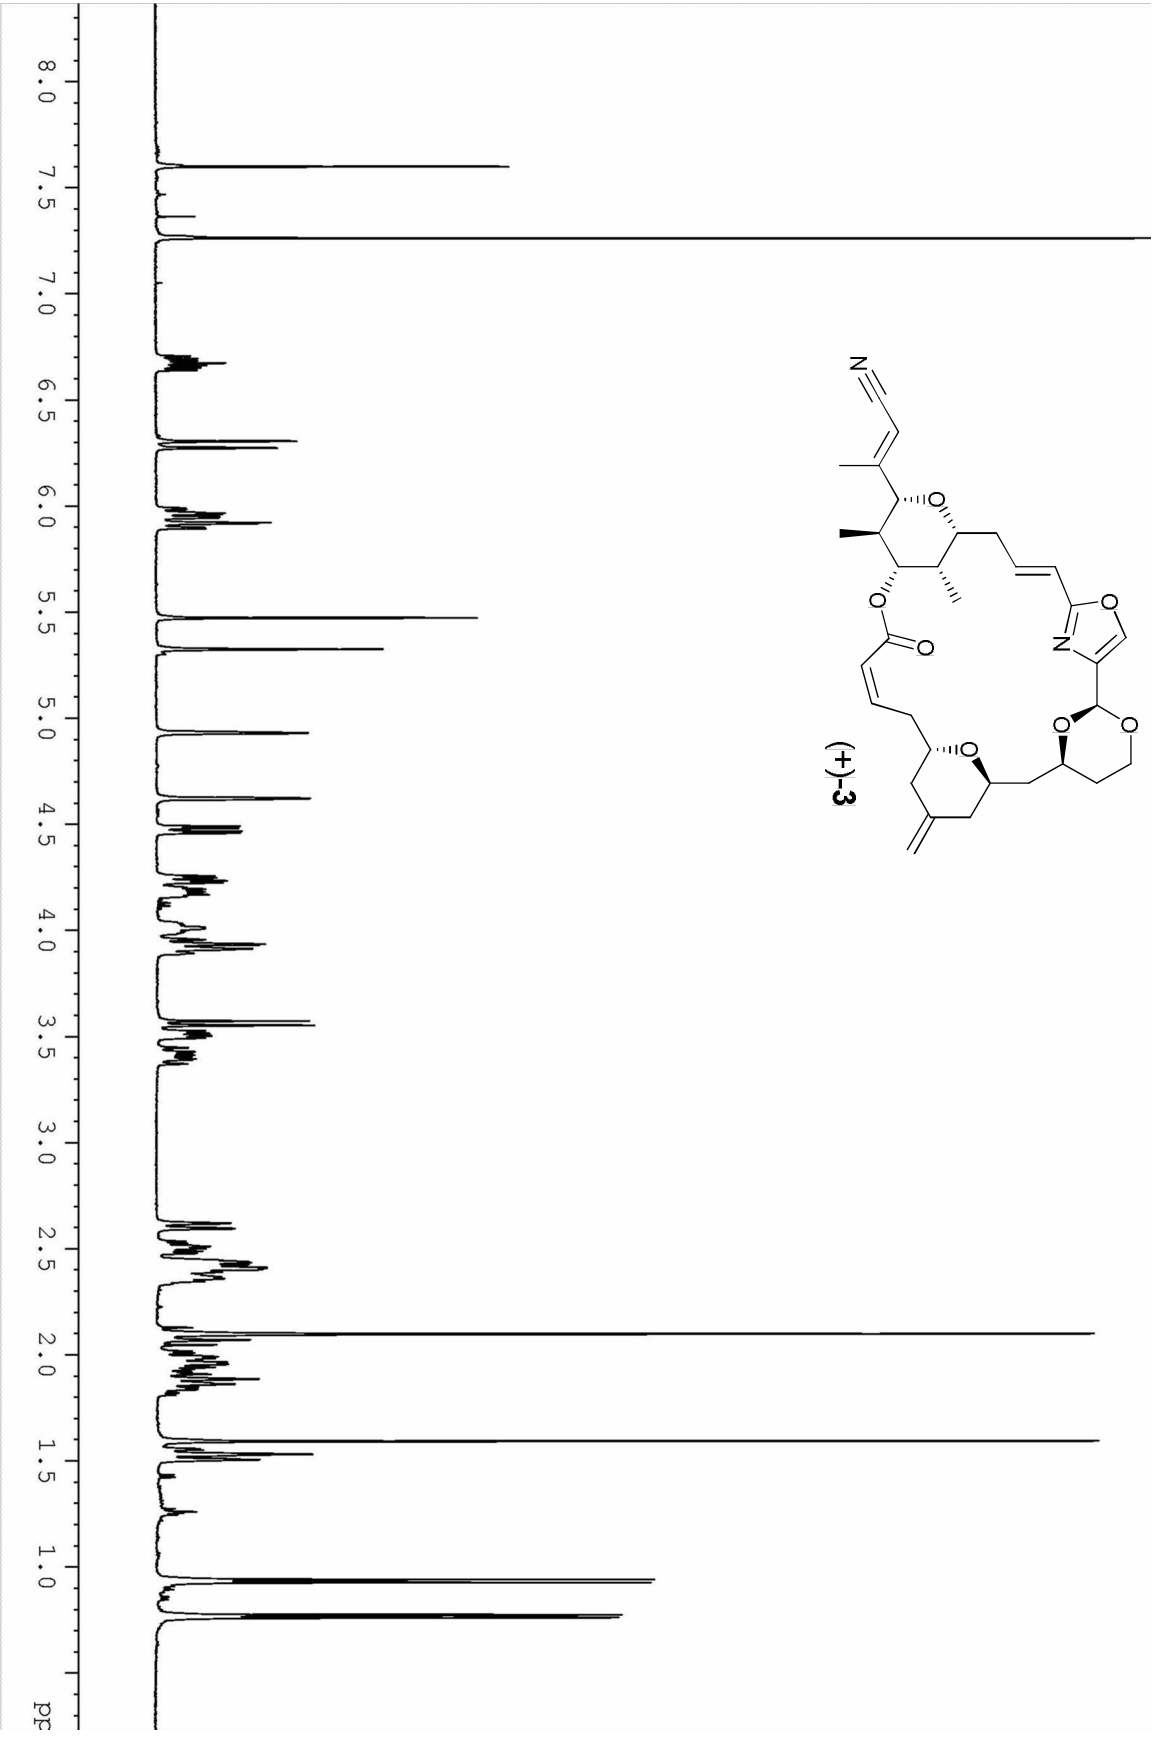



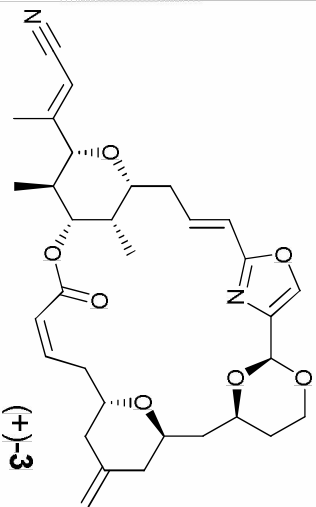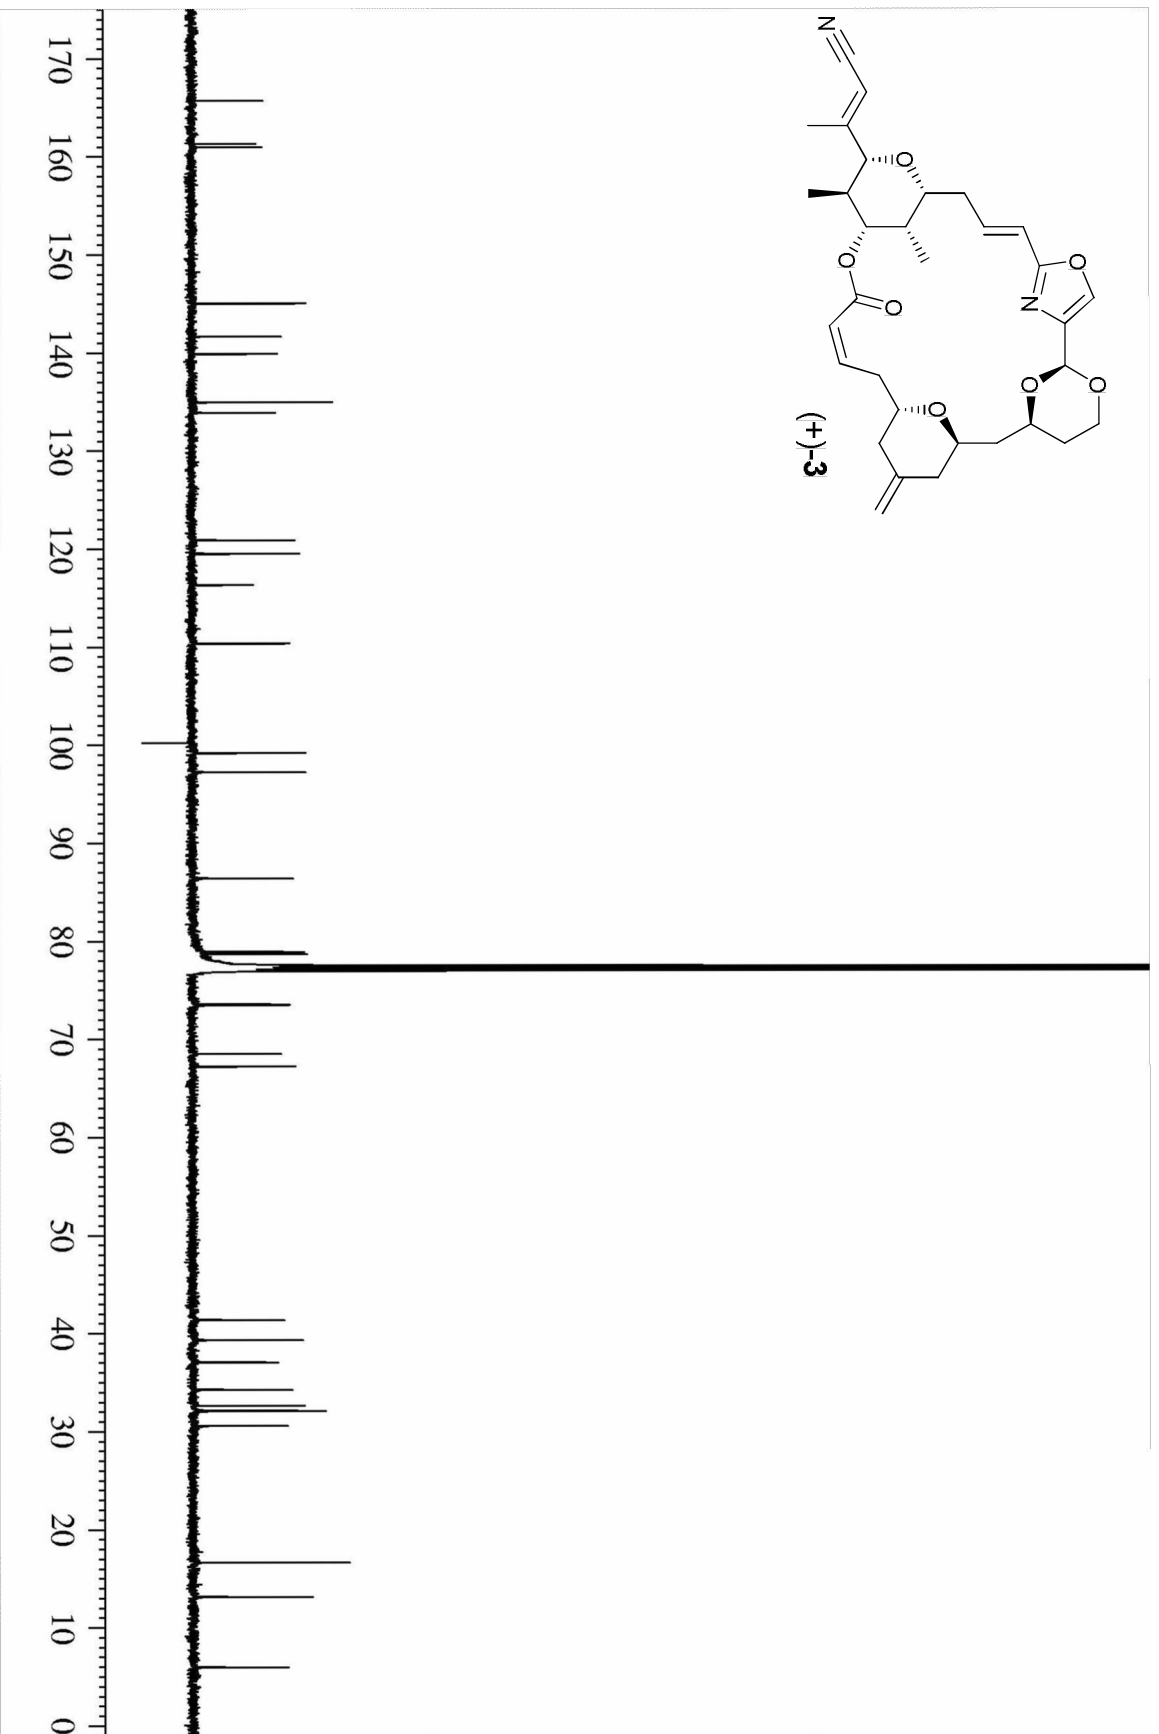

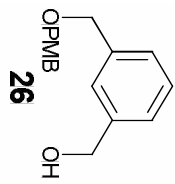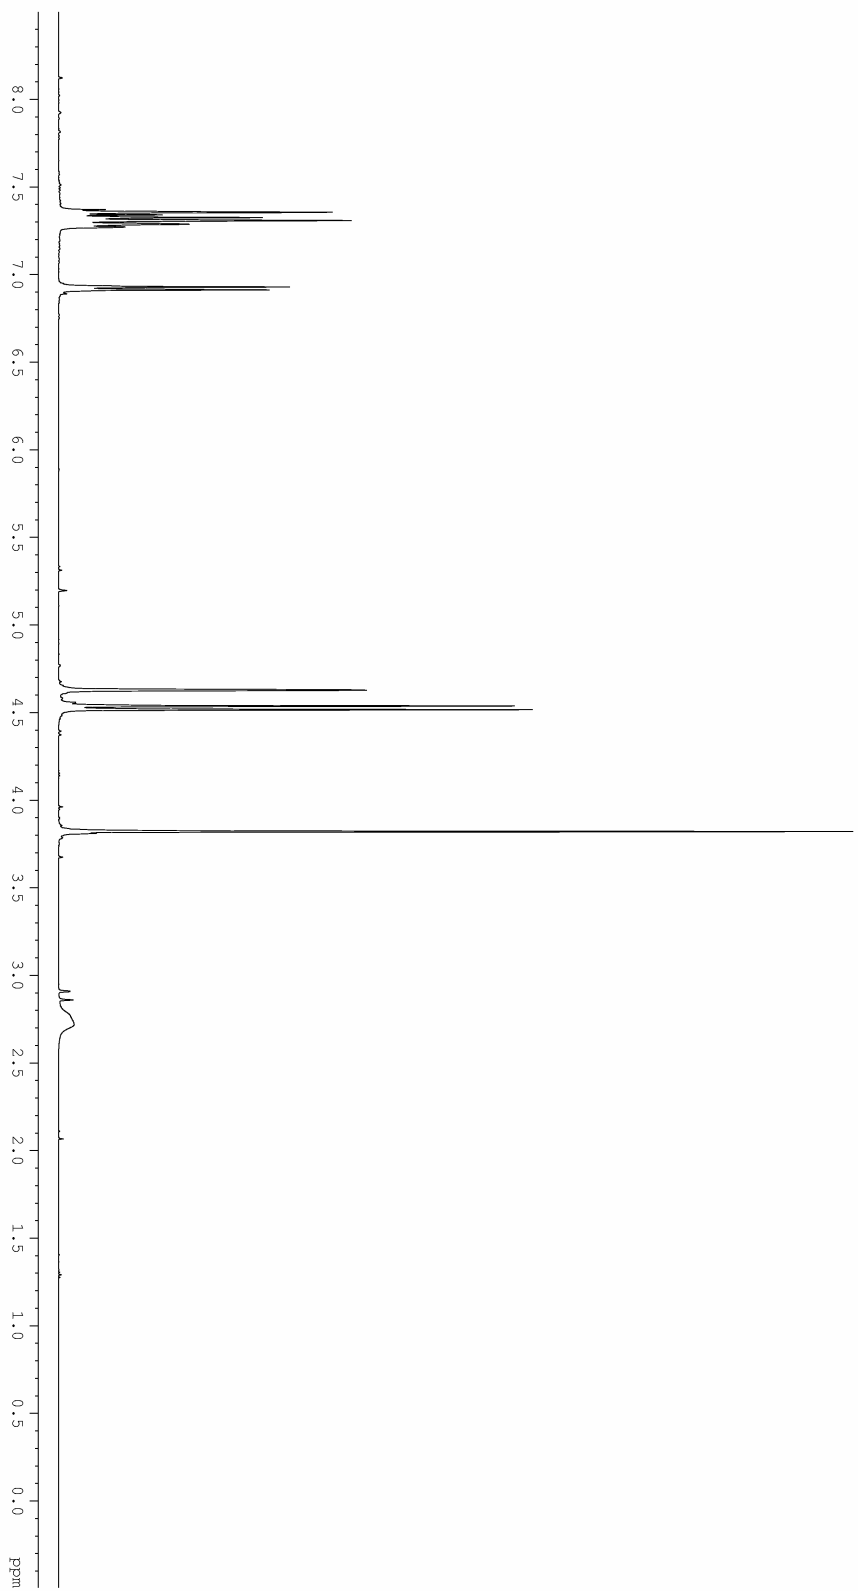

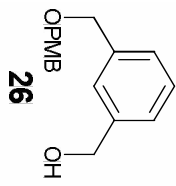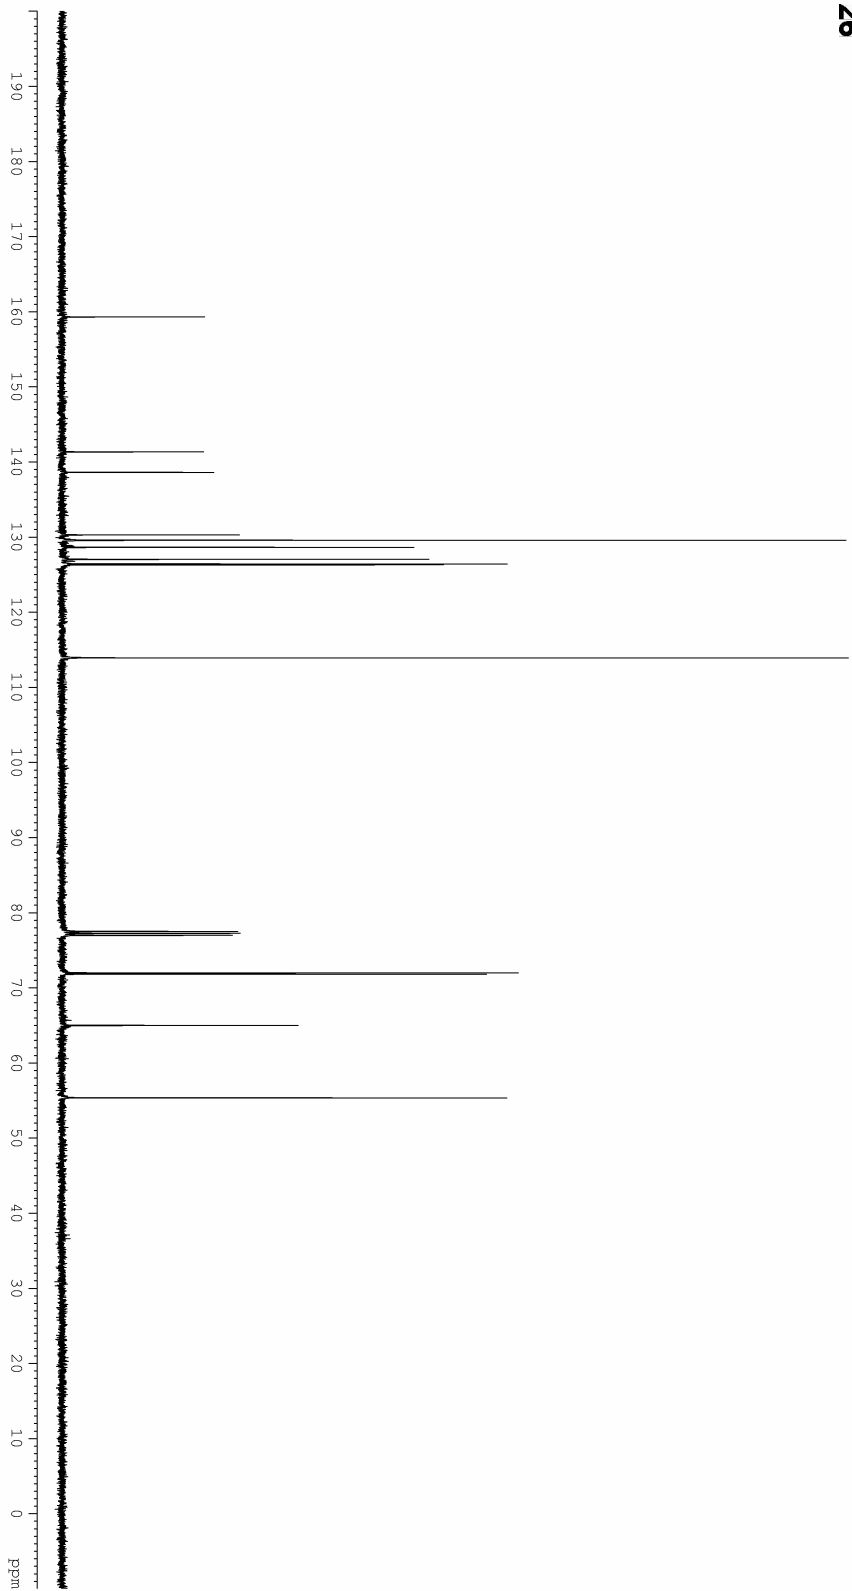

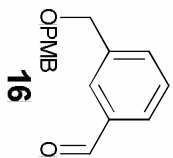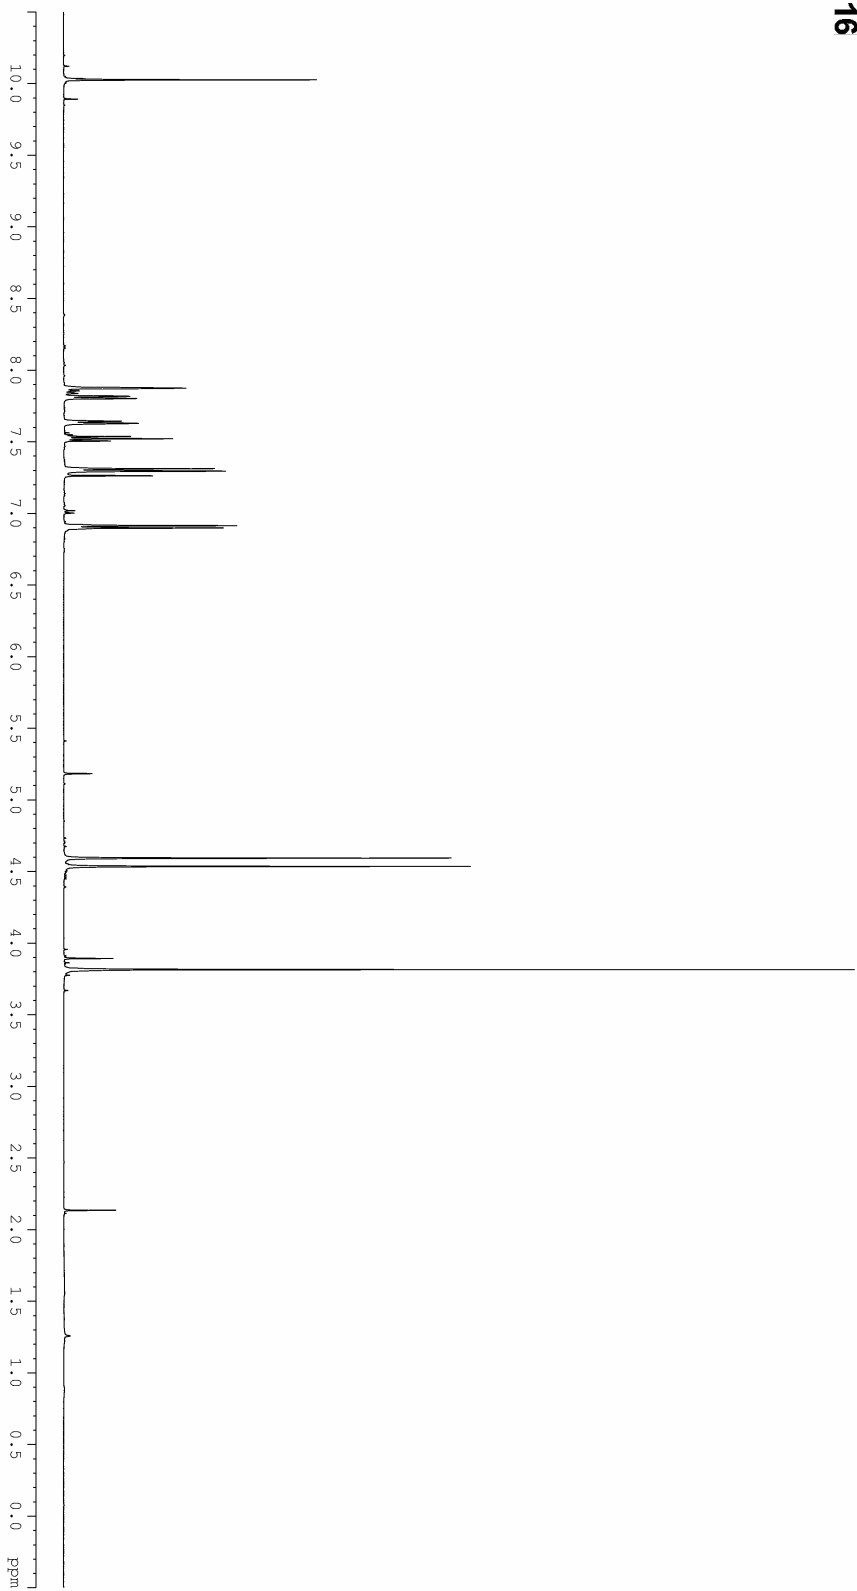

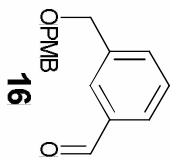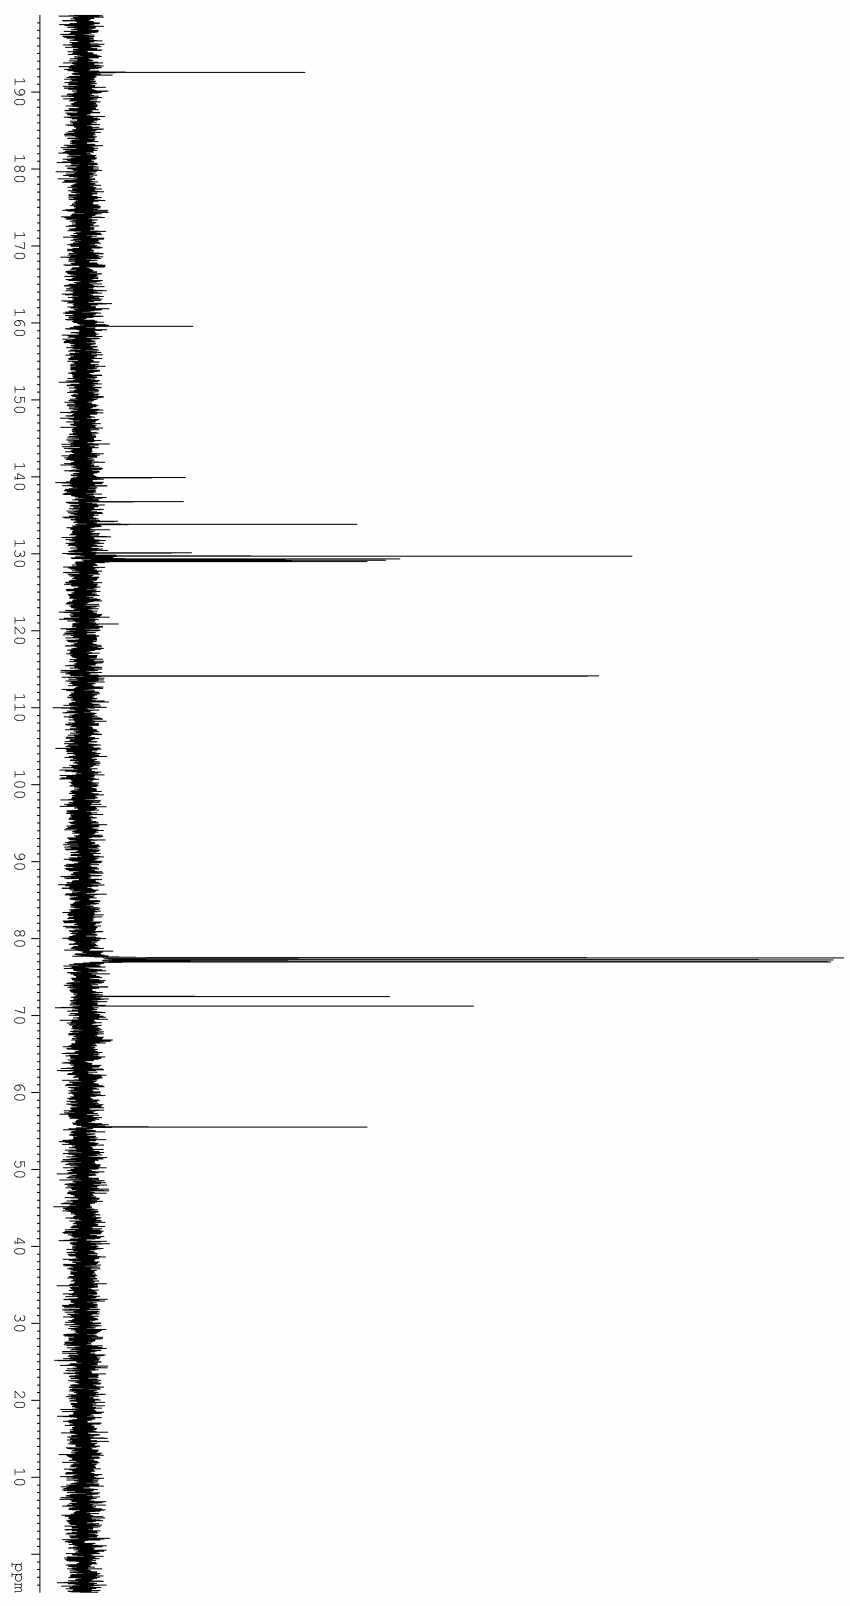

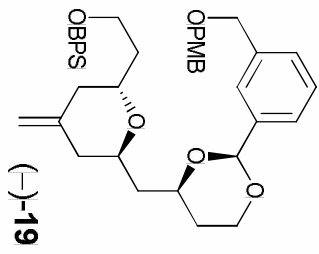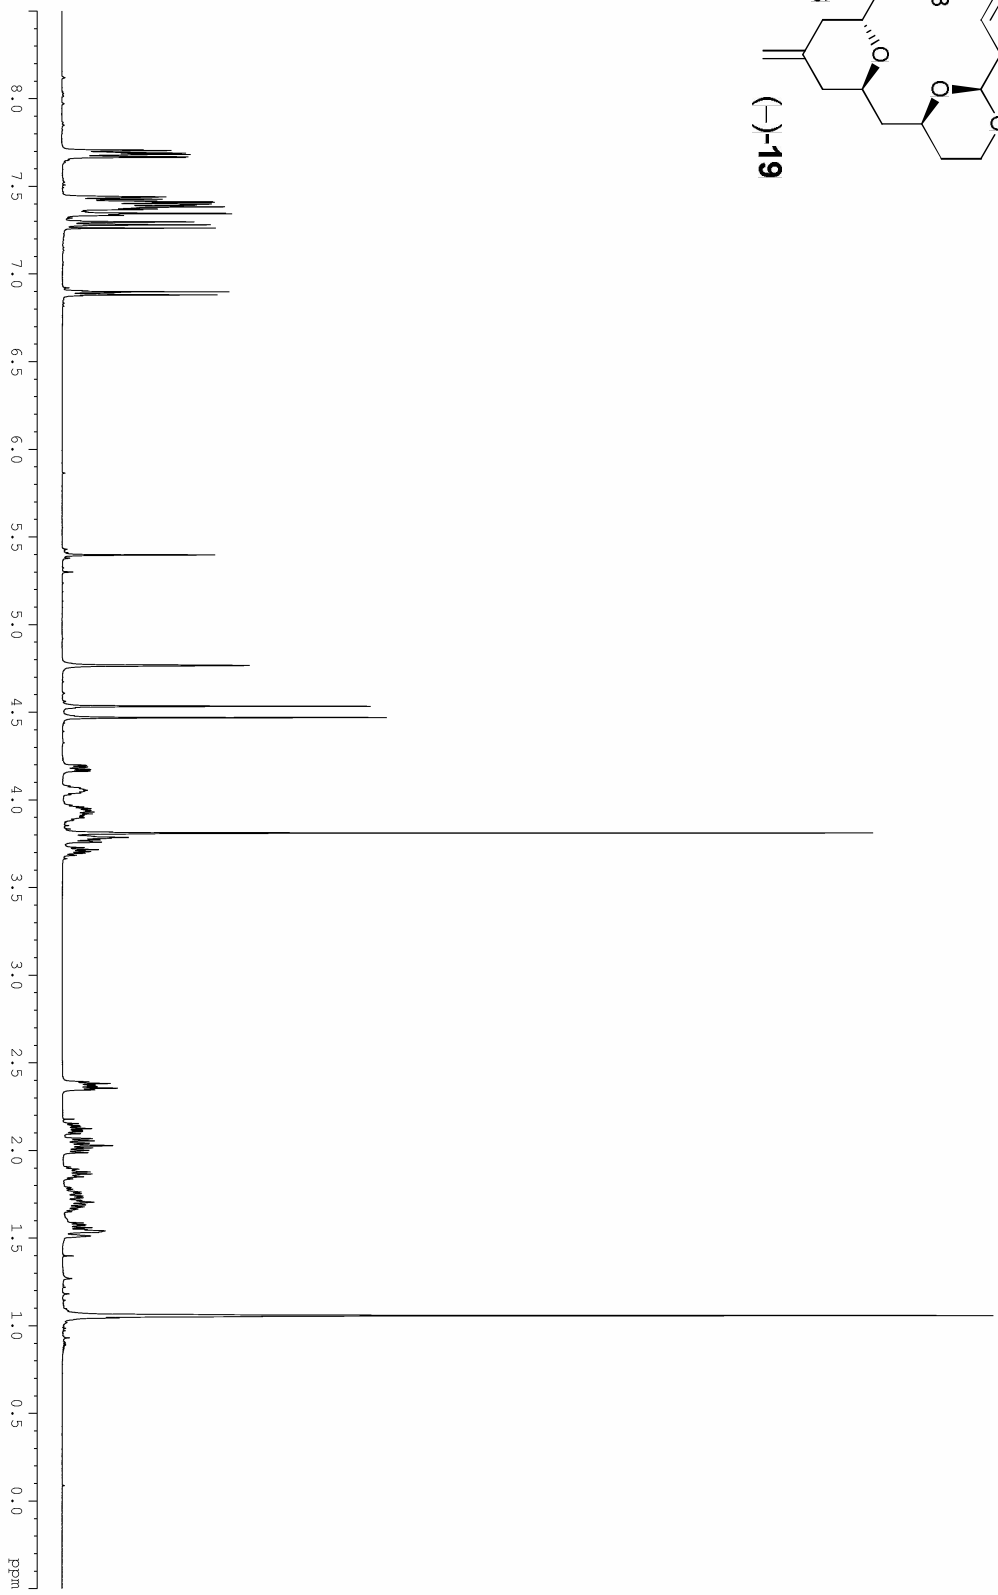

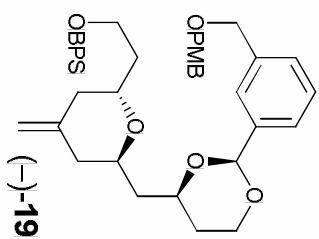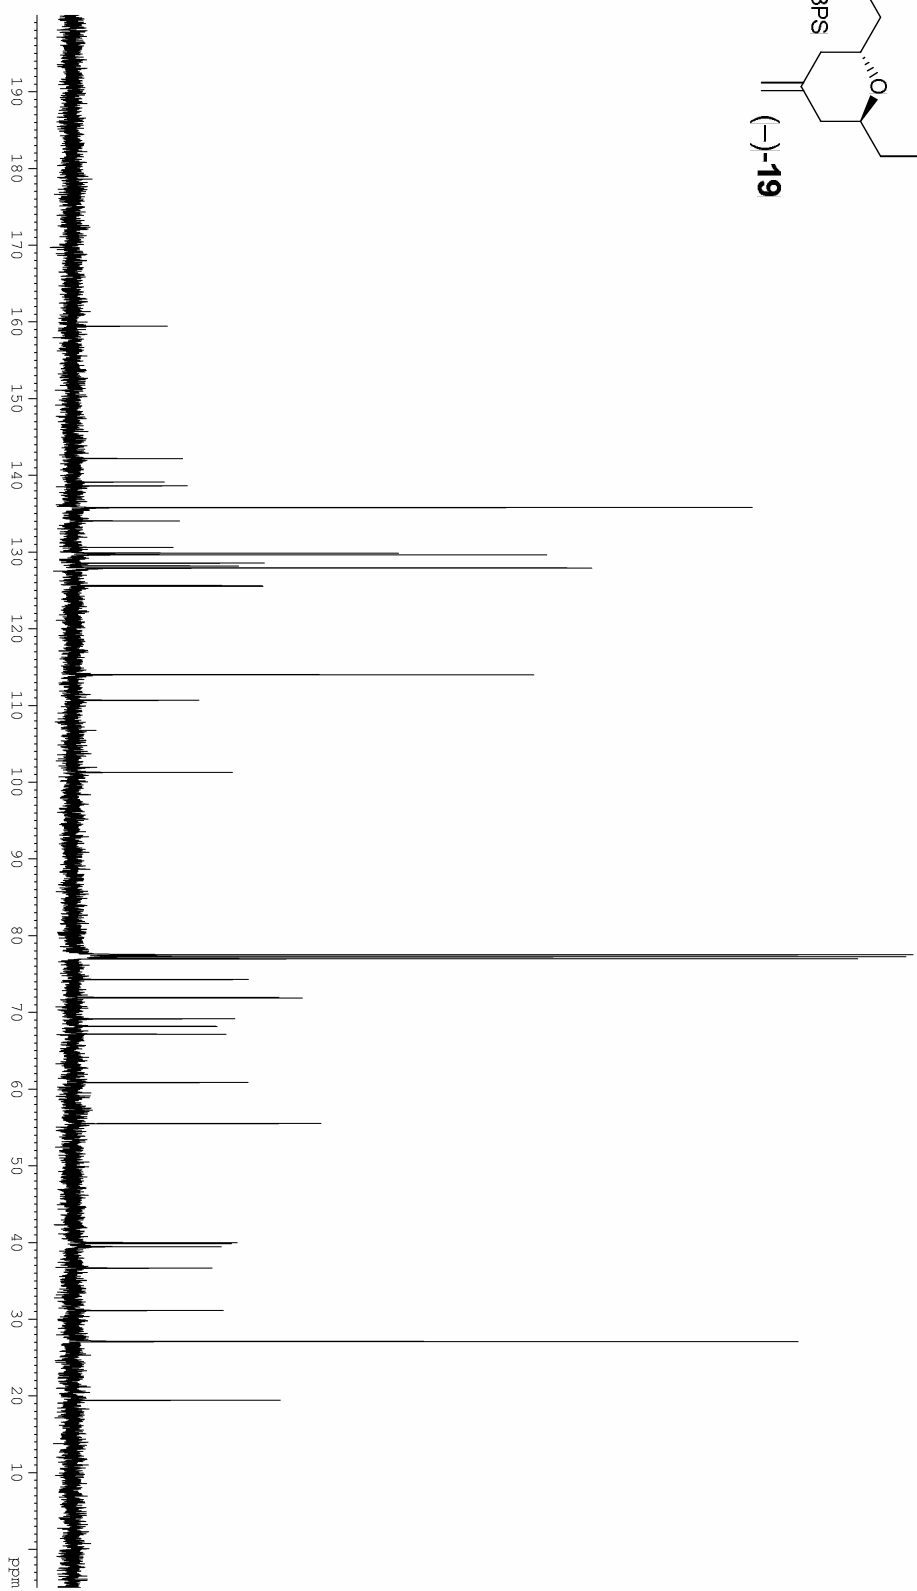

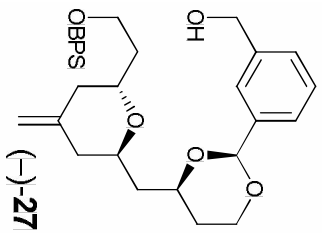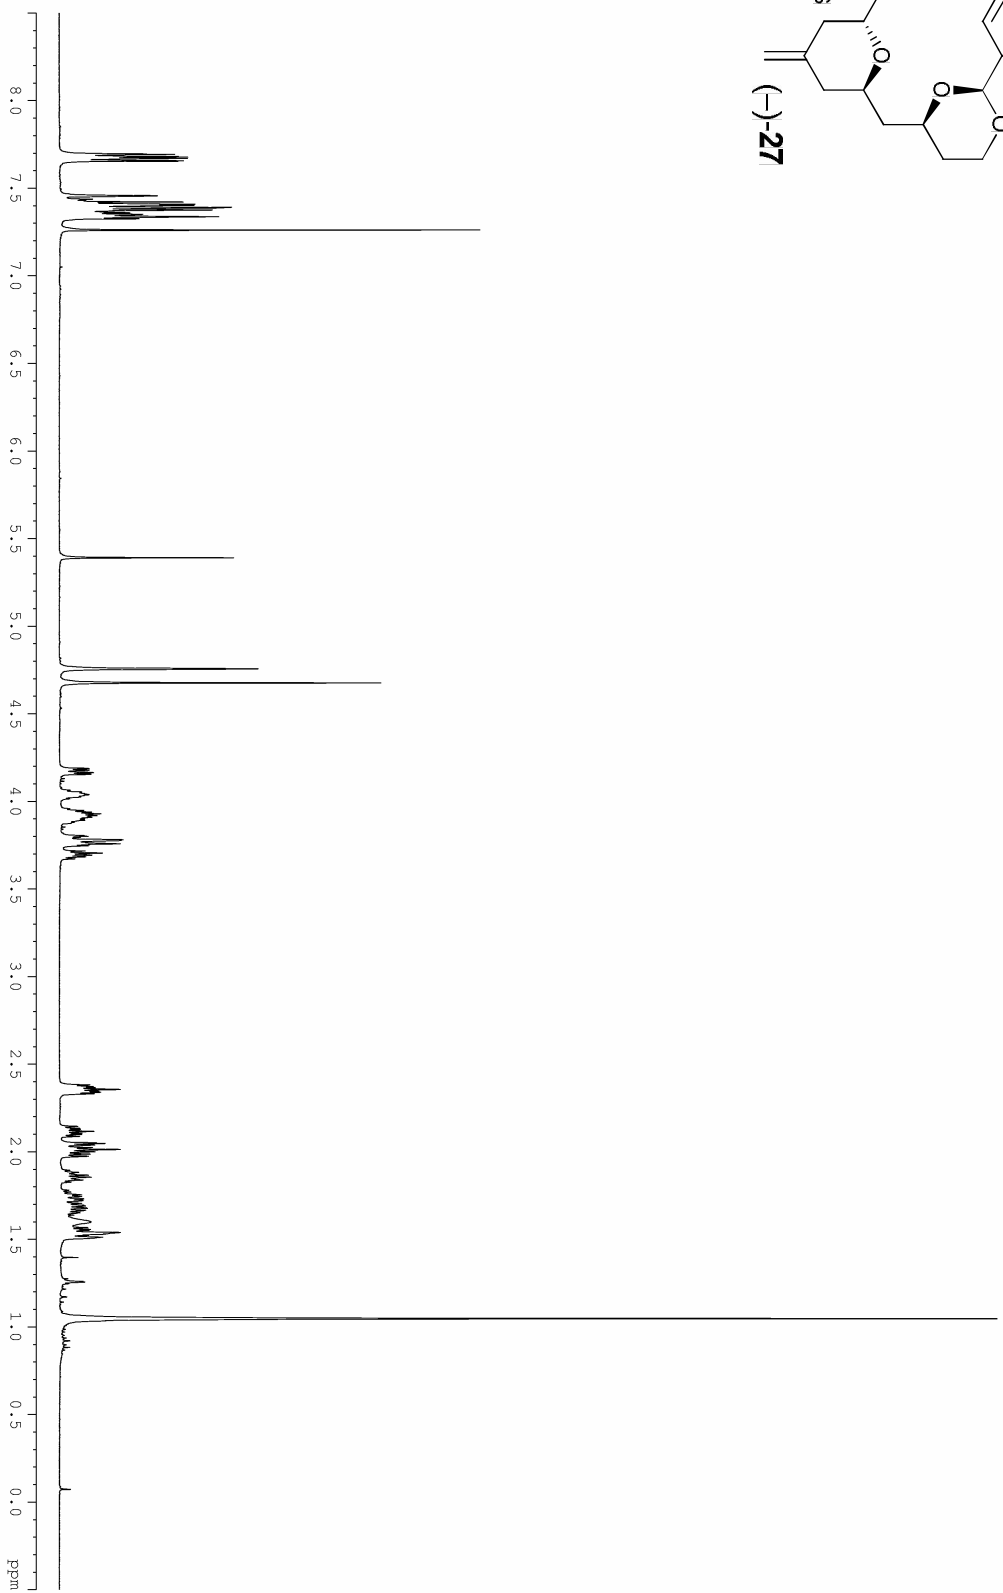



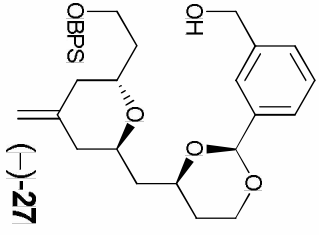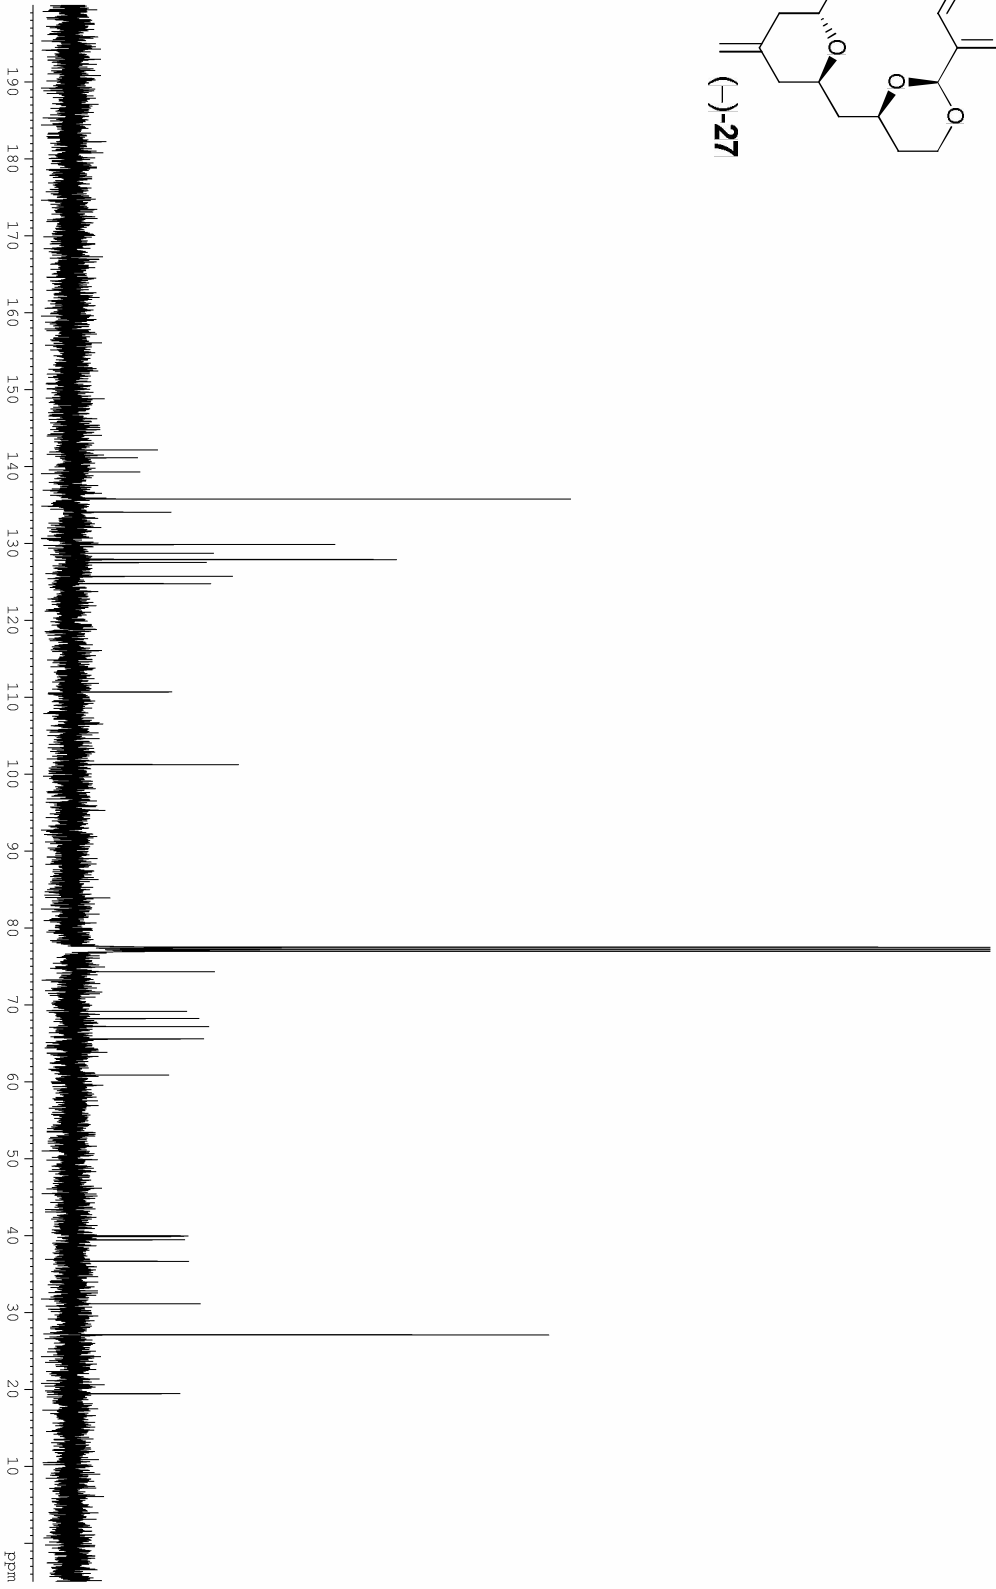

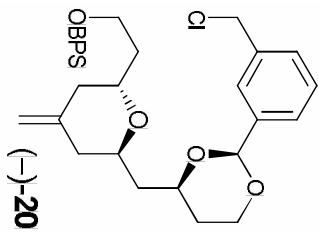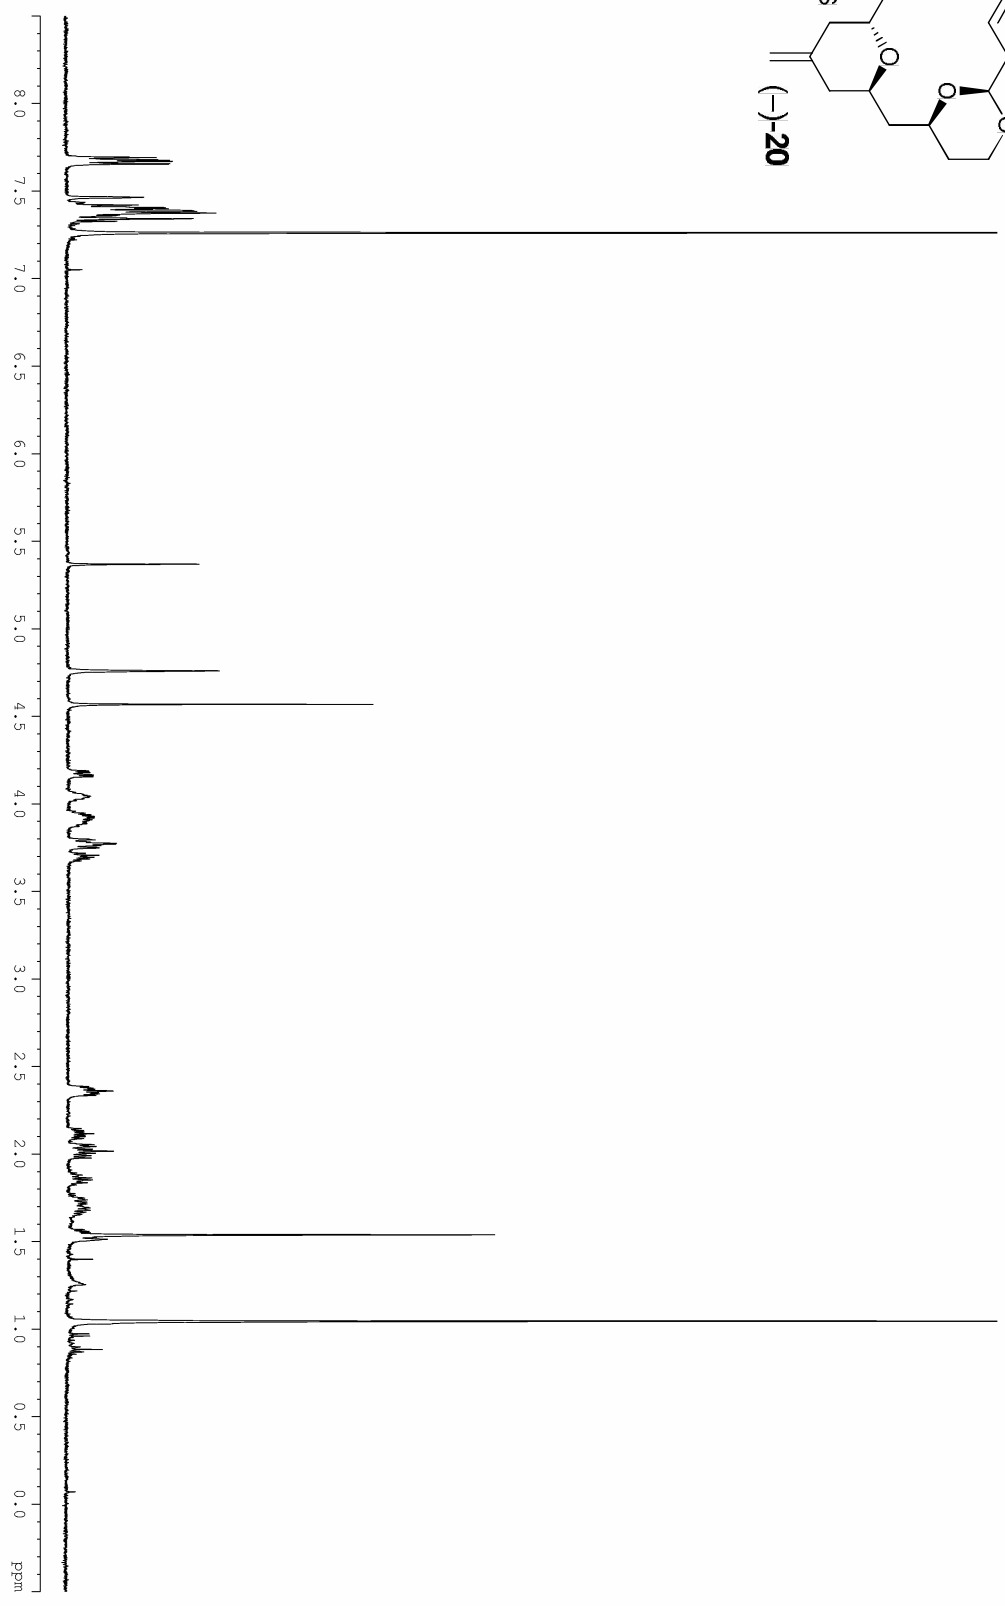

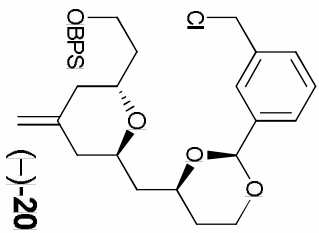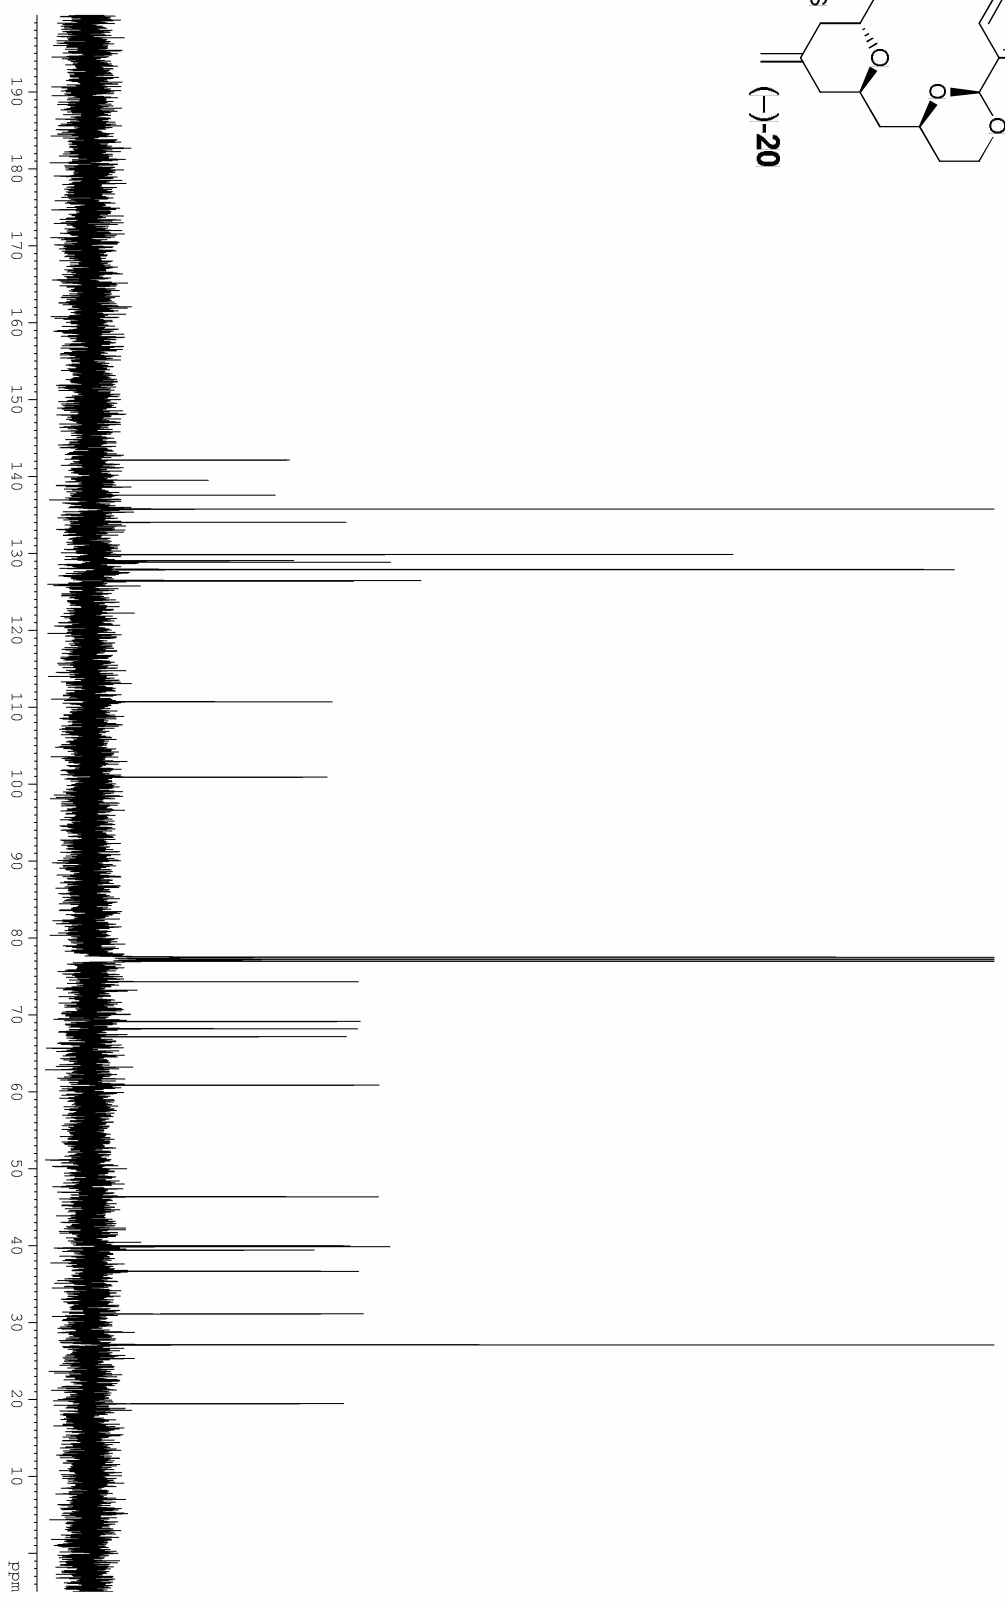

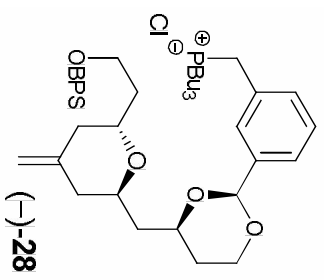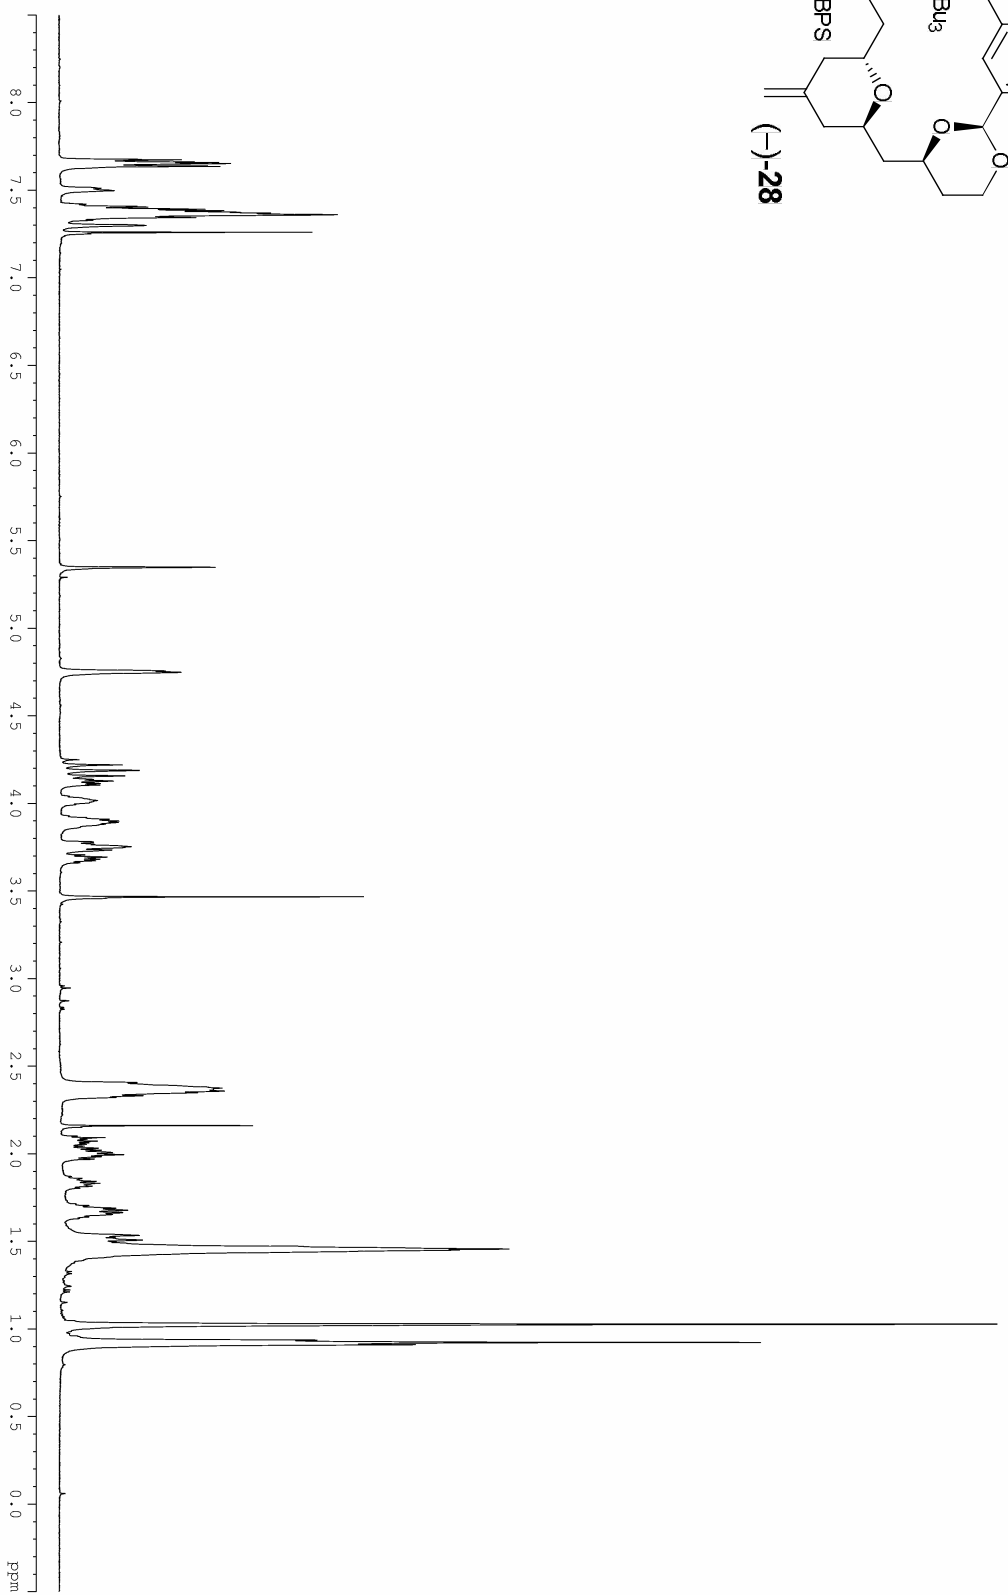

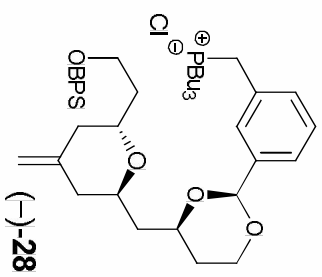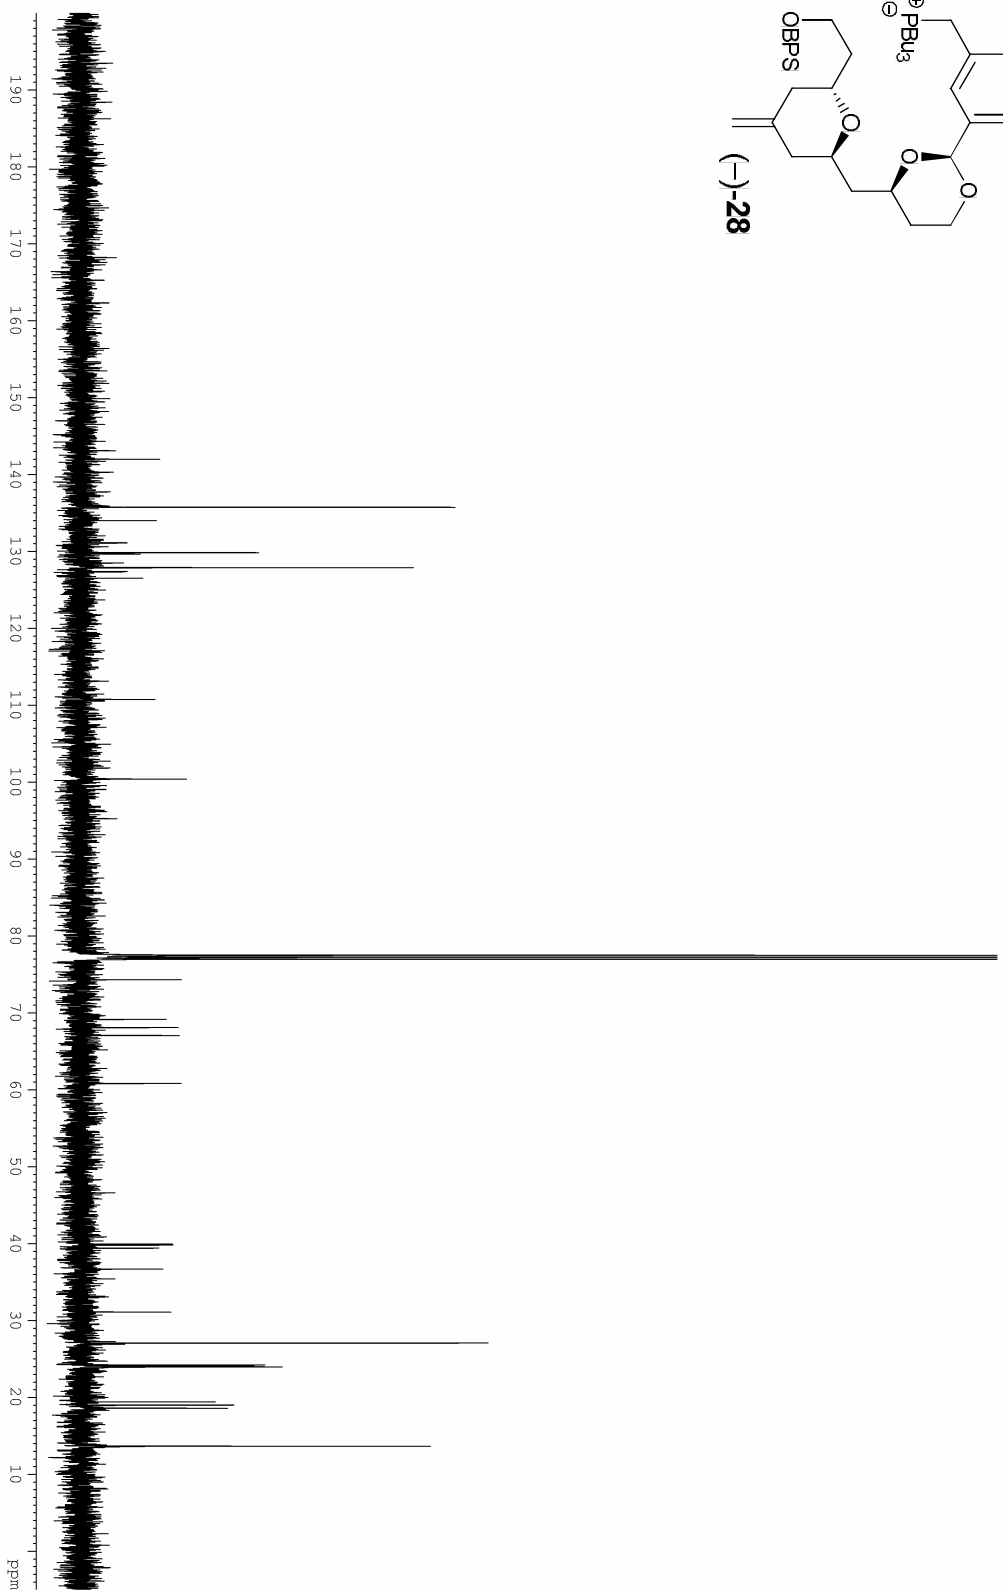

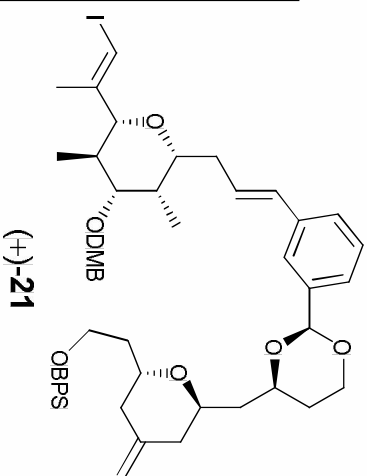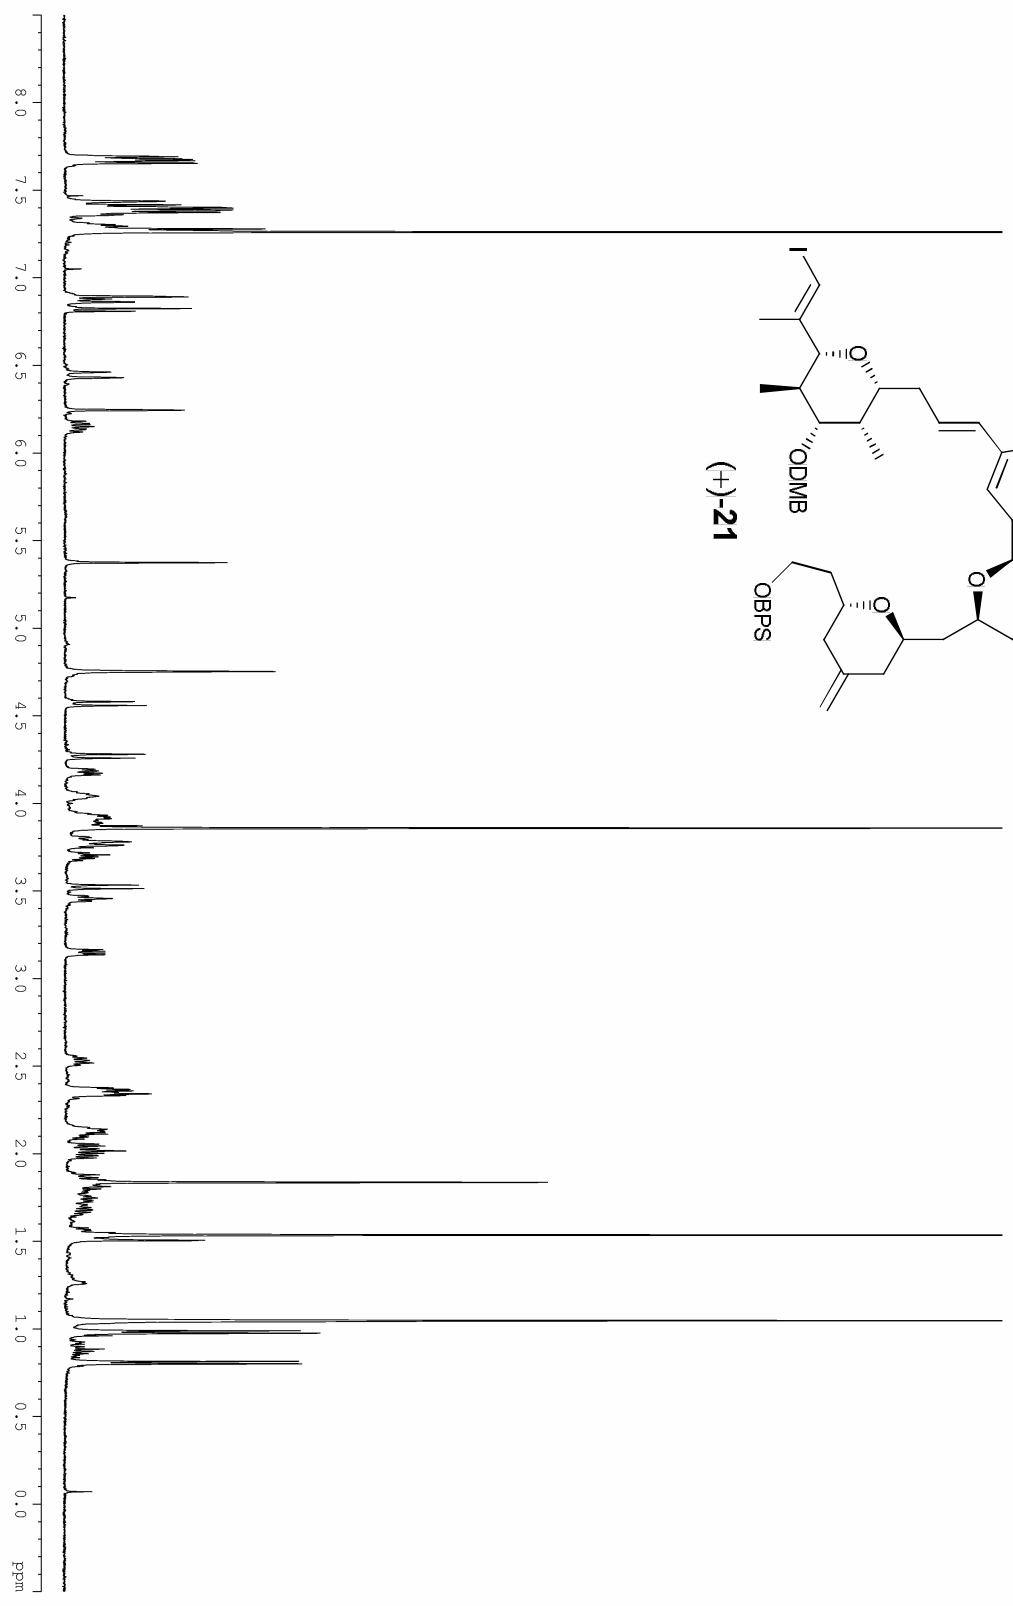

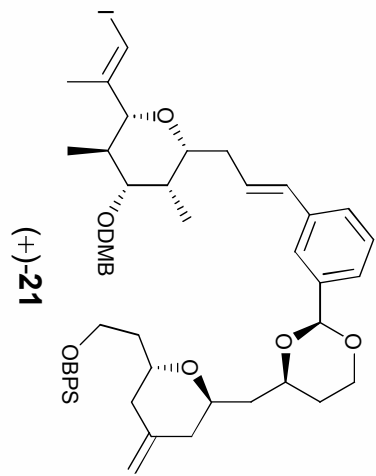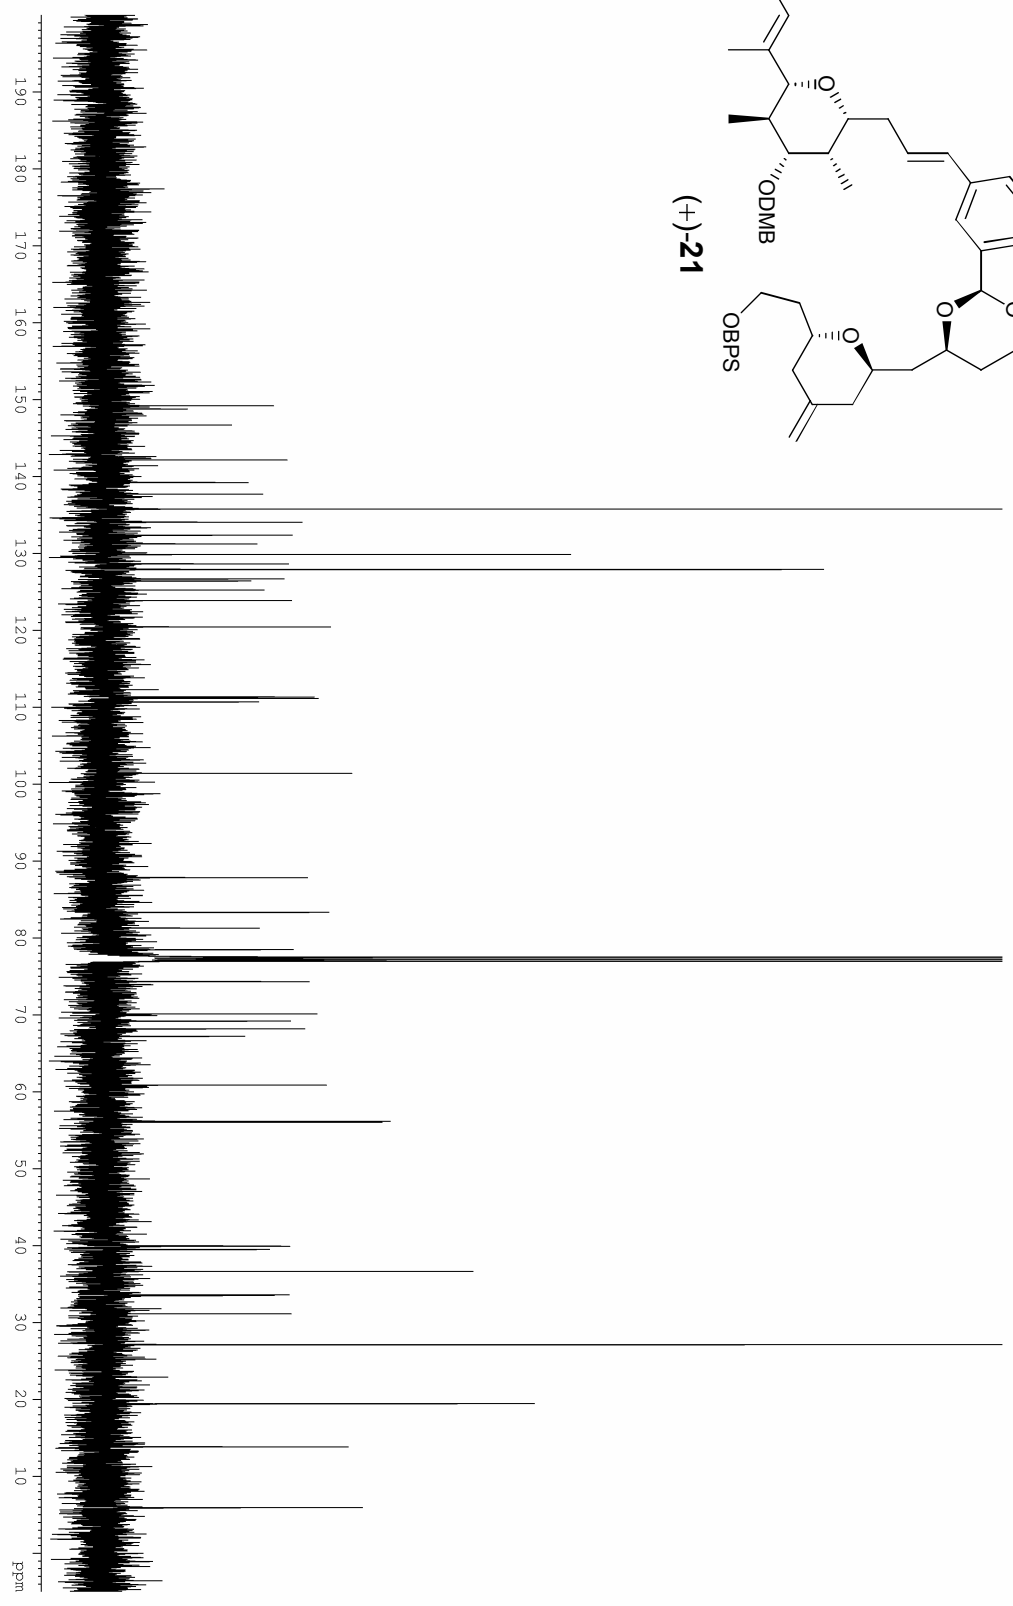

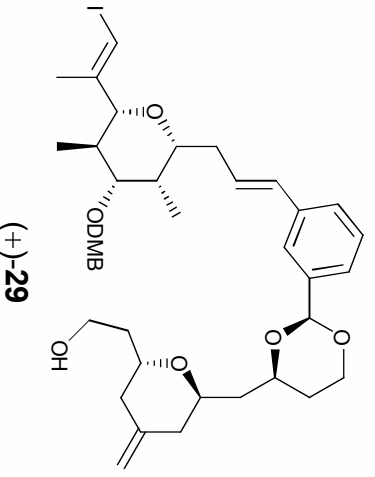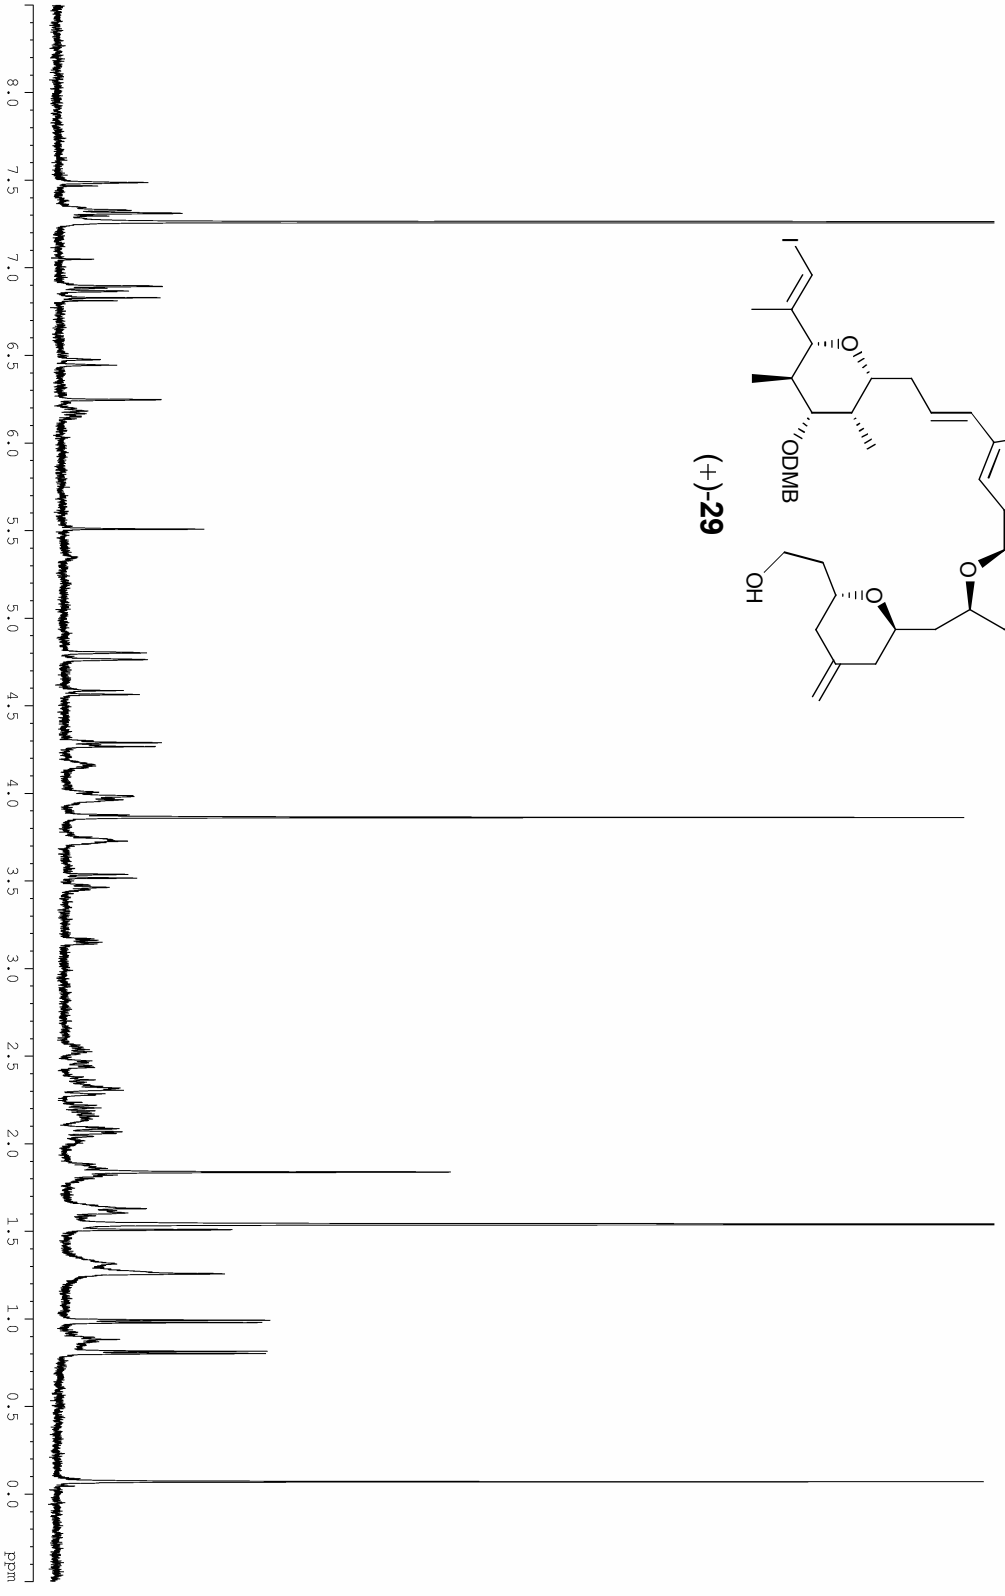



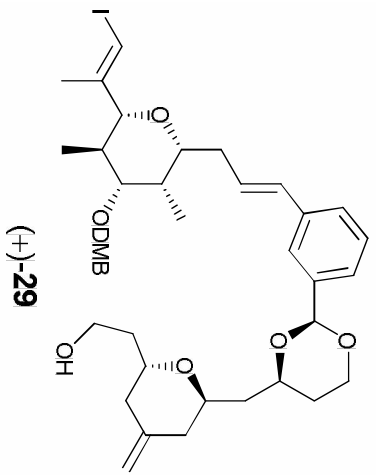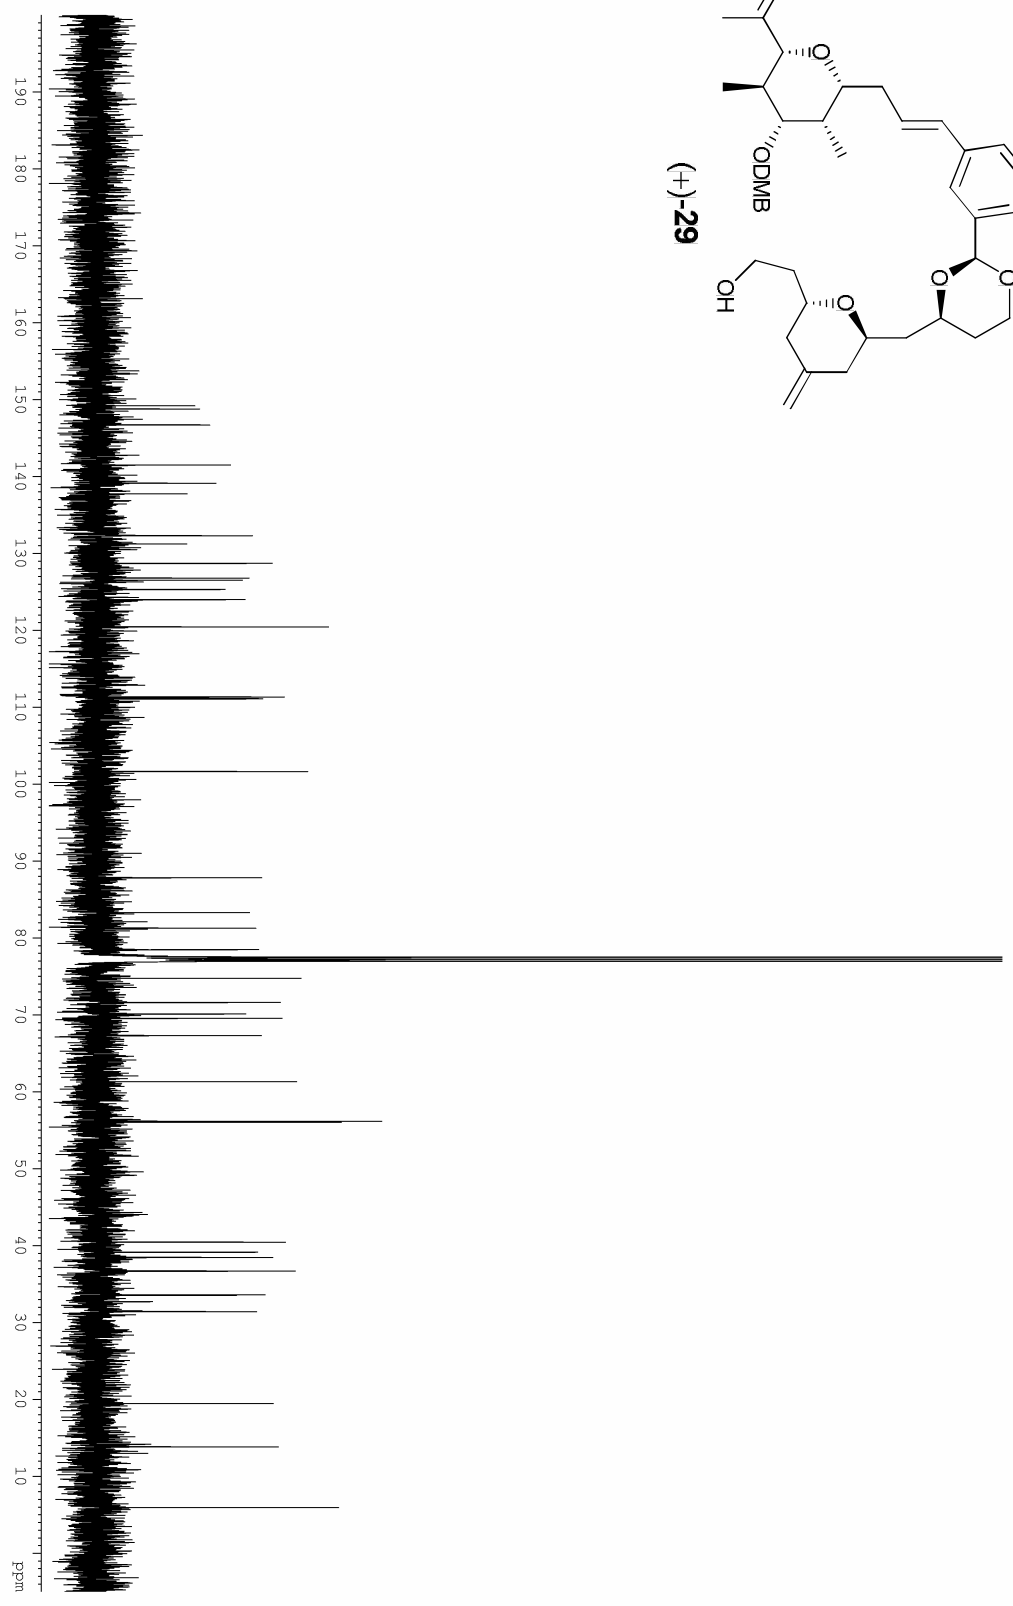

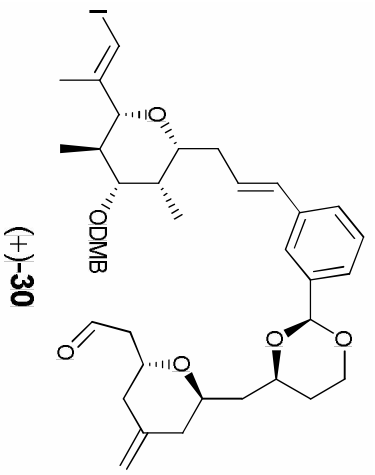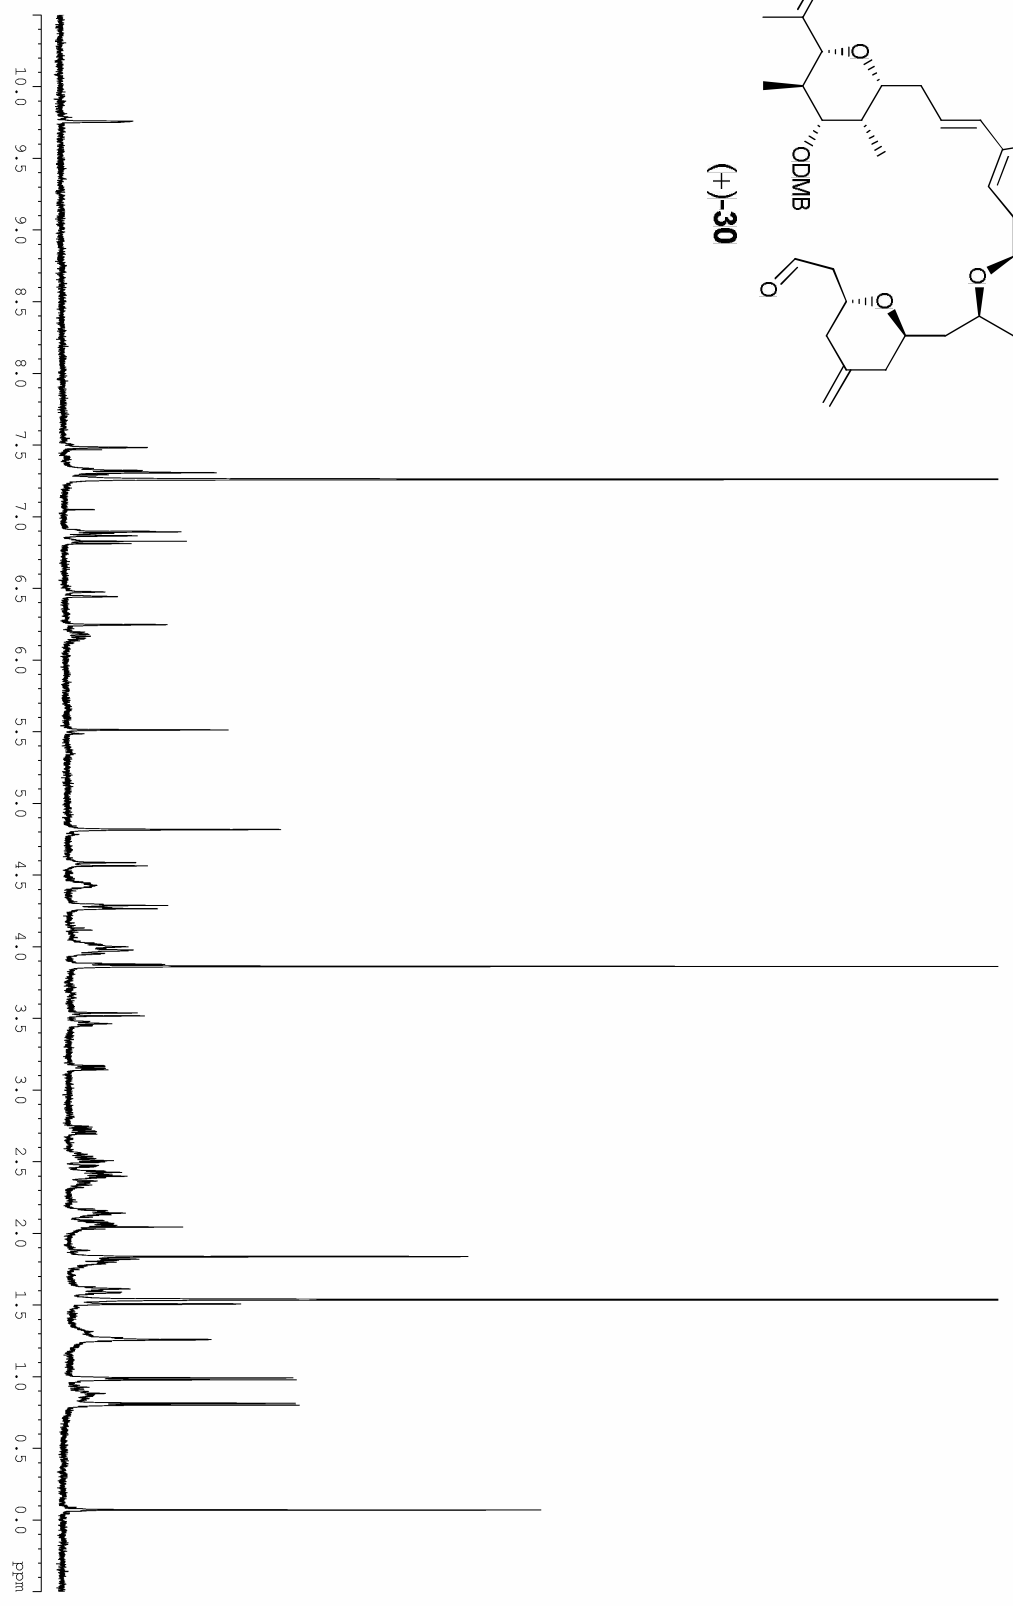

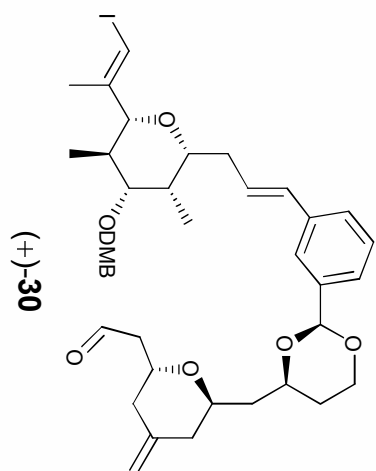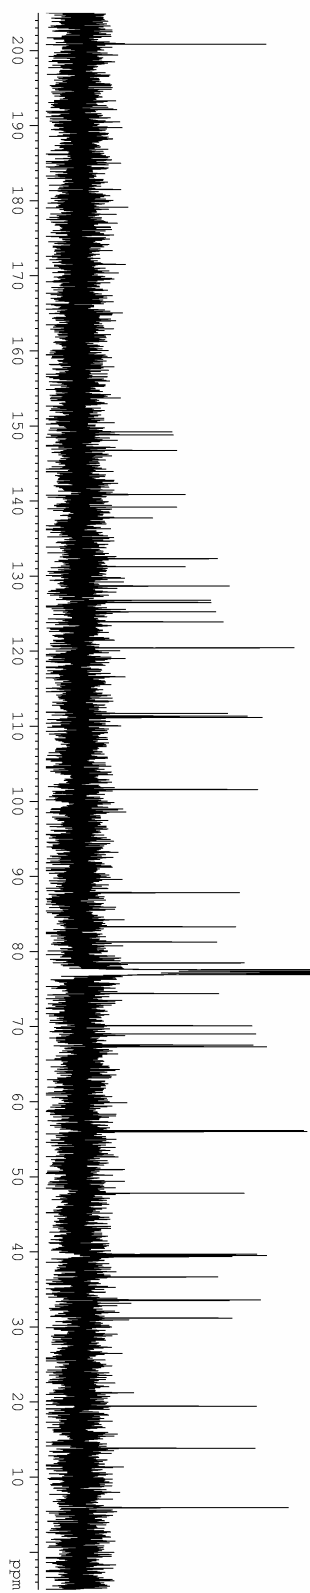





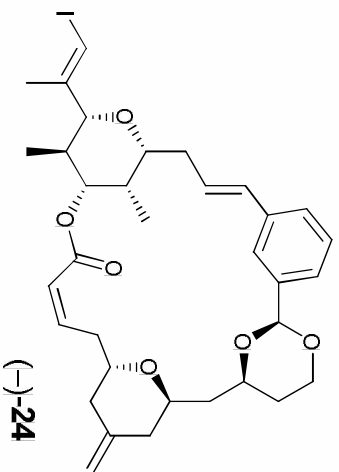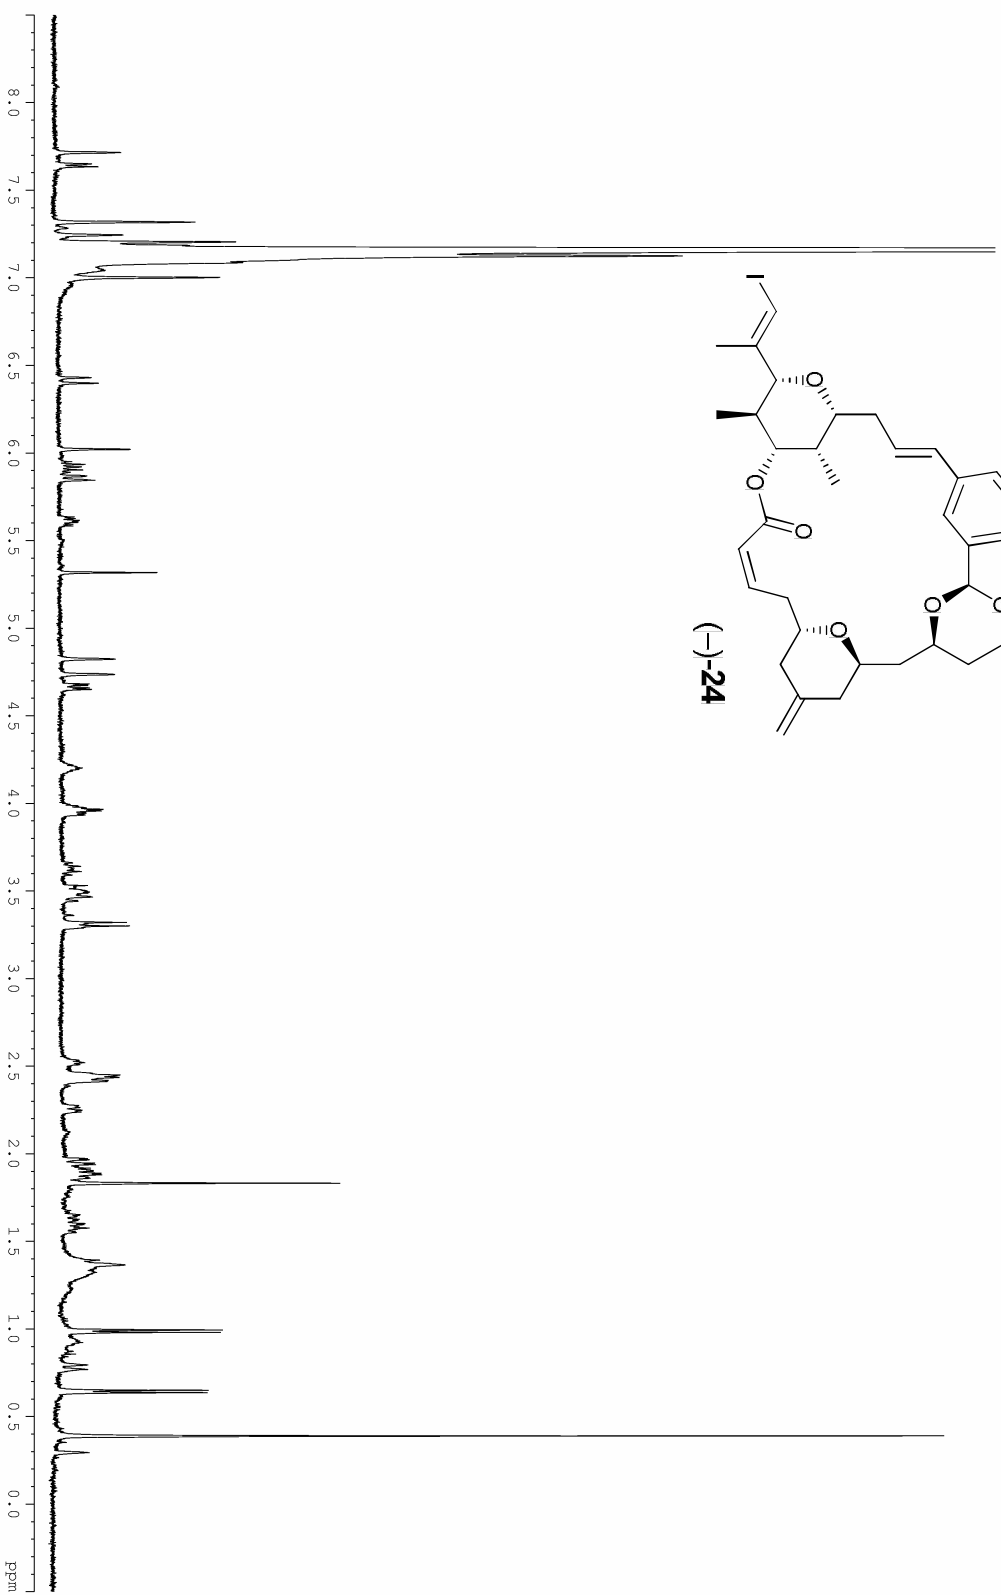

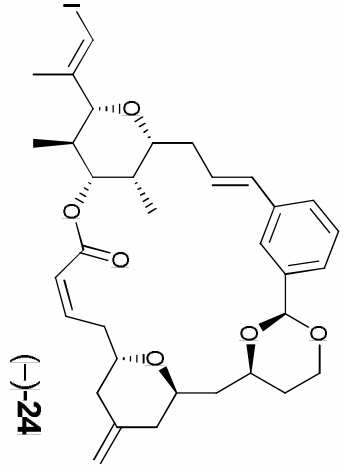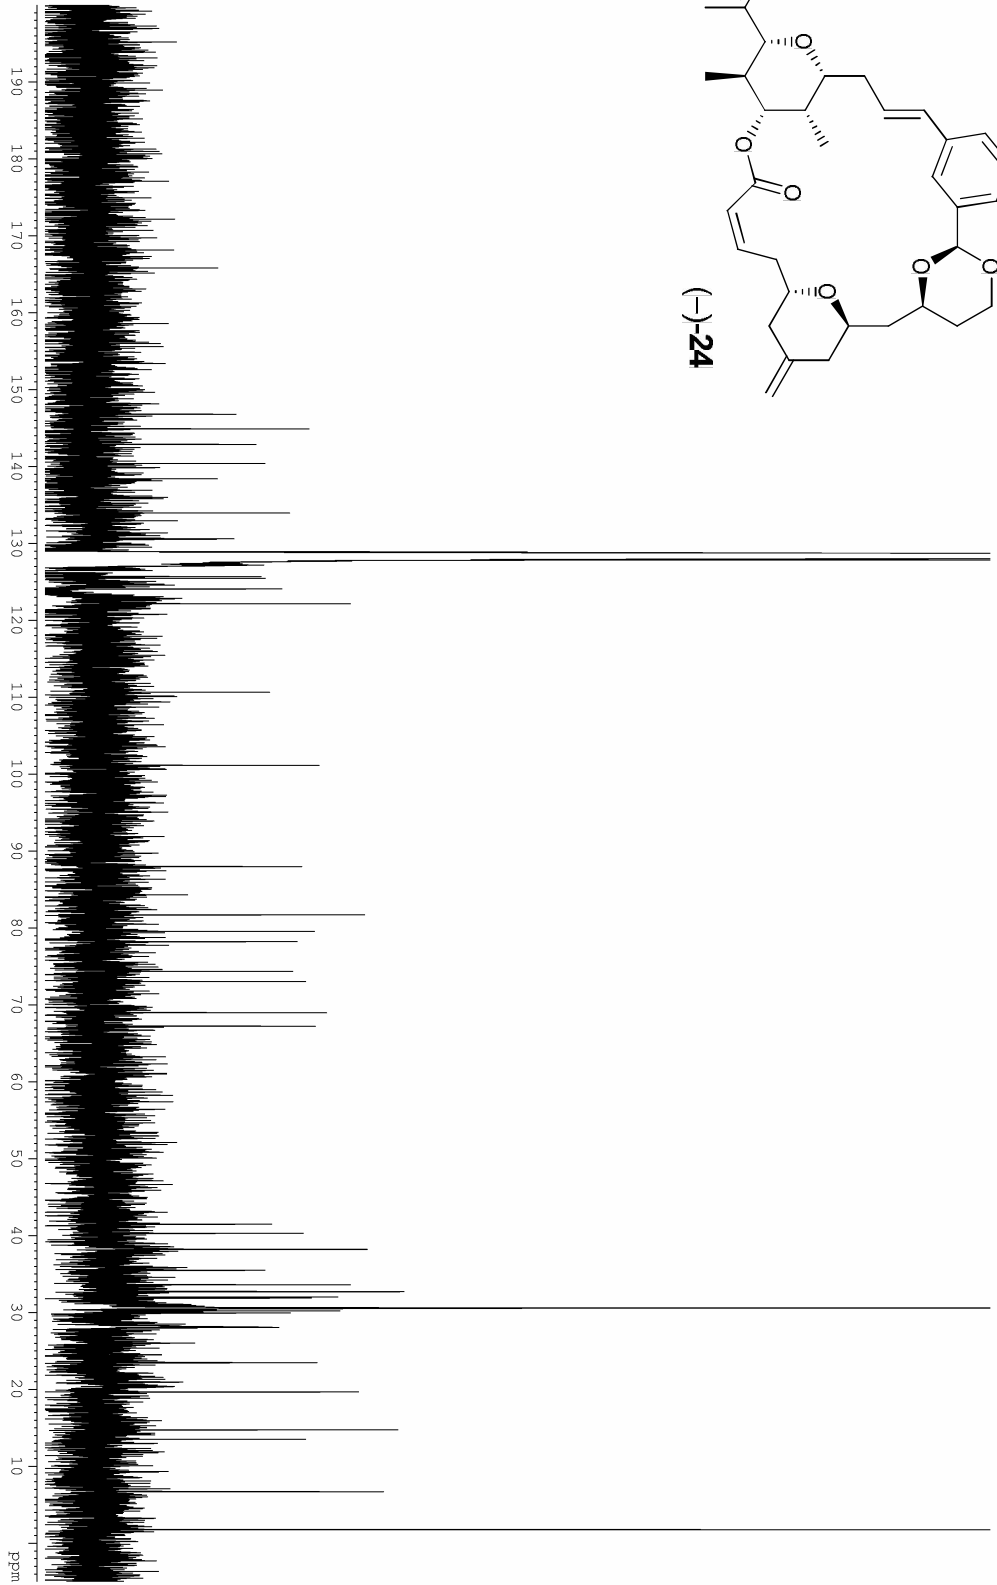

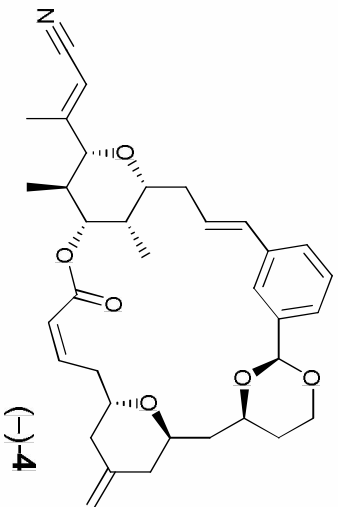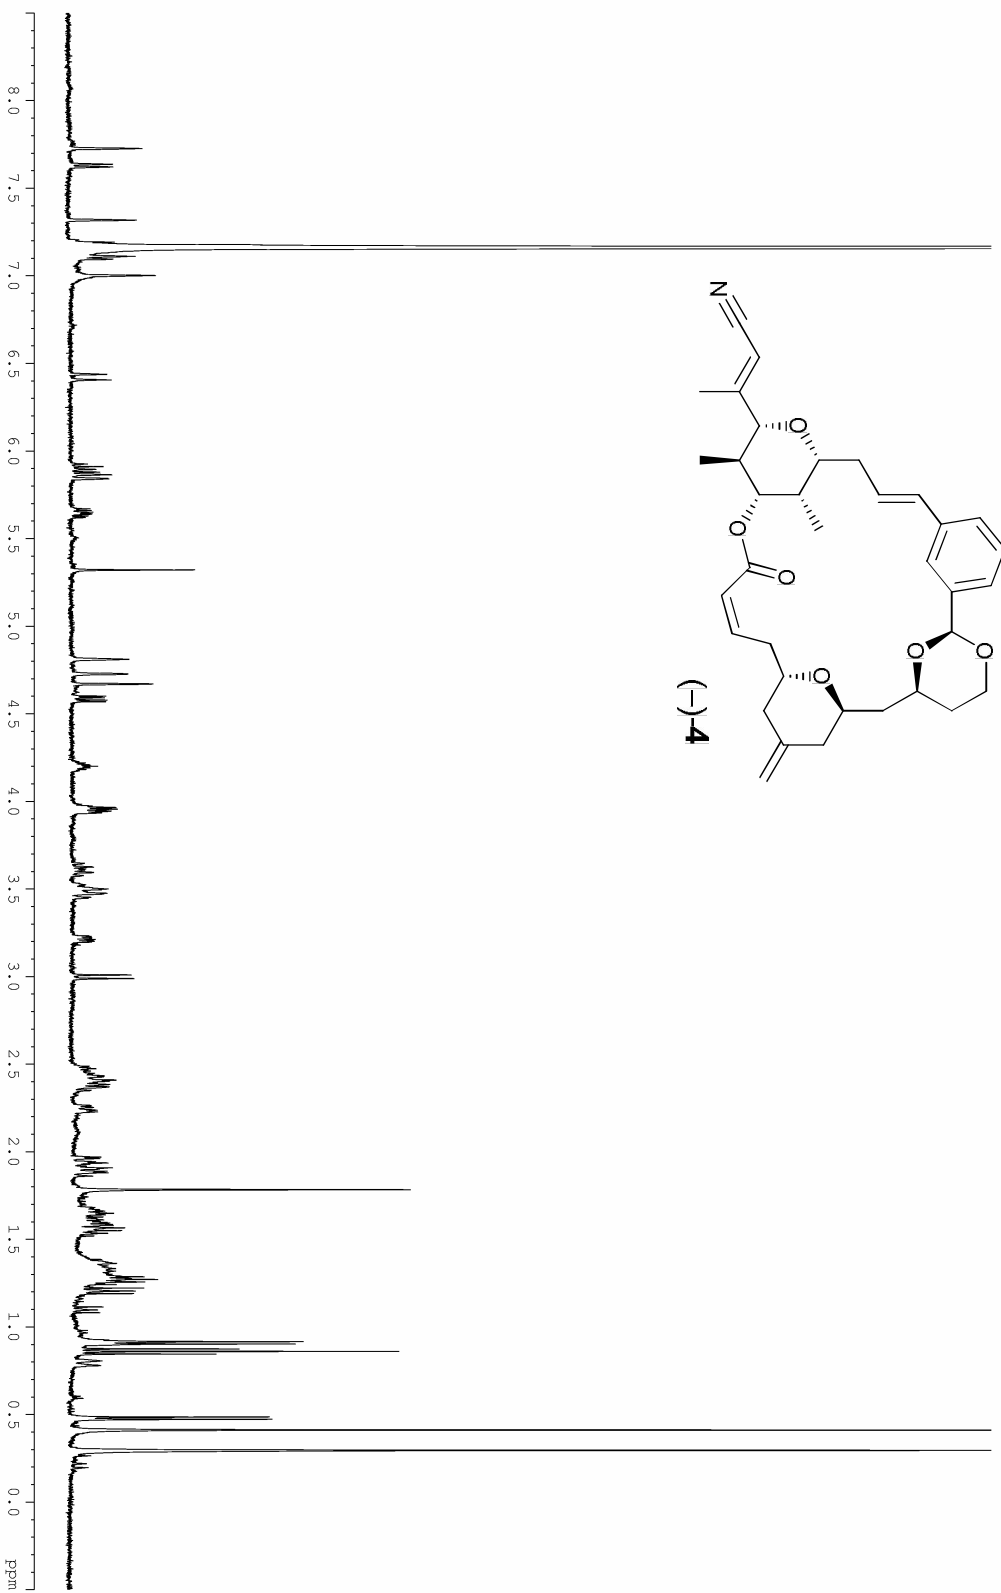



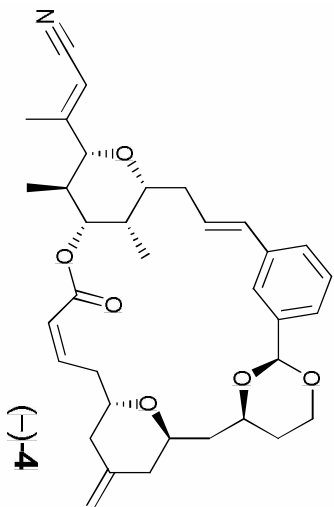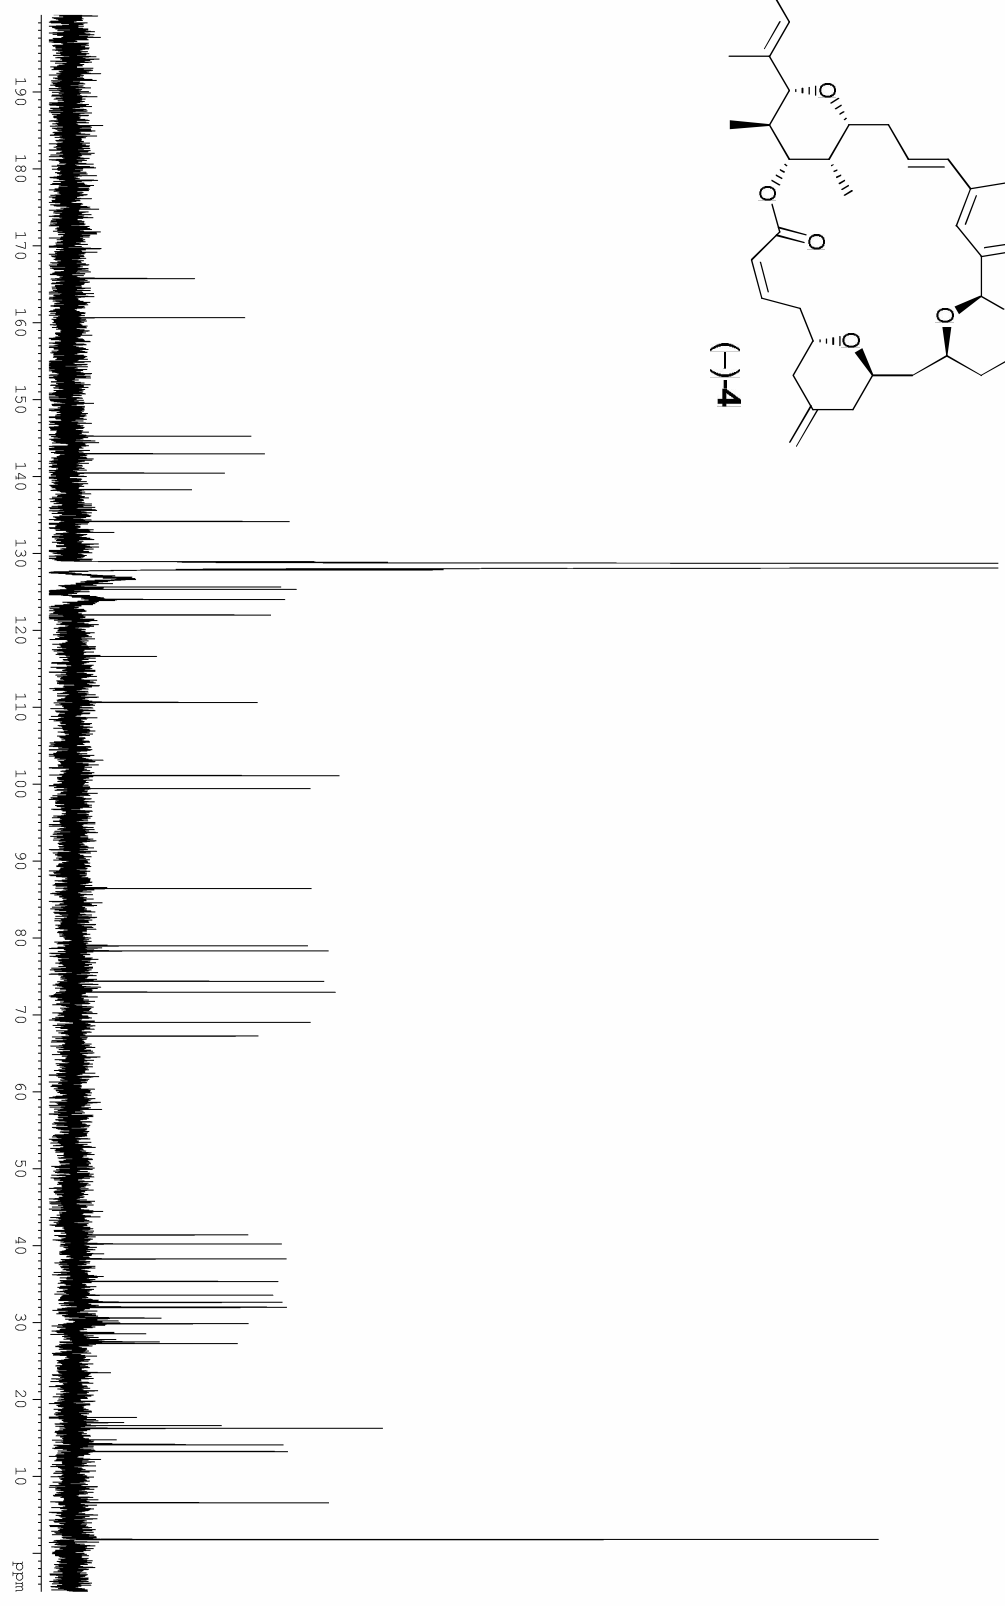

Supplement: NIHMS135772-supplement-2_si_002.pdf [file NIHMS135772-supplement-2_si_002.pdf]
